1 **Selection of HIV-1 for Resistance to Fourth Generation Protease Inhibitors Reveals Two**  
2 **Independent Pathways to High-Level Resistance**

3  
4 Ean Spielvogel<sup>1,2</sup>, Sook-Kyung Lee<sup>2</sup>, Shuntai Zhou<sup>2</sup>, Gordon J. Lockbaum<sup>3</sup>, Mina Henes<sup>3</sup>, Amy  
5 Sondgeroth<sup>1,2</sup>, Klajdi Kosovrasti<sup>3</sup>, Akbar Ali<sup>3</sup>, Nese Kurt Yilmaz<sup>3</sup>, Celia A. Schiffer<sup>3\*</sup>, Ronald  
6 Swanstrom<sup>2,4\*</sup>

7  
8 <sup>1</sup>Department of Microbiology and Immunology, University of North Carolina at Chapel Hill,  
9 Chapel Hill, NC, 27599, USA

10 <sup>2</sup>Lineberger Comprehensive Cancer Center, University of North Carolina at Chapel Hill, Chapel  
11 Hill, NC, 27599, USA

12 <sup>3</sup>Department of Biochemistry and Molecular Pharmacology, University of Massachusetts  
13 Medical School, Worcester, MA 01605, USA

14 <sup>4</sup>Department of Biochemistry and Biophysics, University of North Carolina at Chapel Hill,  
15 Chapel Hill, NC, 27599, USA

16  
17 \*Corresponding Author

18 Ronald Swanstrom: Phone: +1 919 966 5710; ron\_swanstrom@med.unc.edu

19 Celia A. Schiffer: Phone: +1 508 856 8008; Celia.Schiffer@umassmed.edu

20  
21  
22

23 **Summary**

24 Well-designed viral protease inhibitors (PIs) potently inhibit replication as well as create  
25 a high genetic barrier for resistance. Through in vivo selective pressure, we have generated  
26 high-level resistance against ten HIV-1 PIs and their precursor, the FDA-approved drug  
27 darunavir (DRV), achieving 1,000-fold resistance over the starting EC50. The accumulation of  
28 mutations revealed two pathways to high-level resistance, resulting in protease variants with up  
29 to 14 mutations in and outside of the active site. The two pathways demonstrate the interplay  
30 between drug resistance and viral fitness. Replicate selections showed that one inhibitor could  
31 select for resistance through either pathway, although subtle changes in chemical structure of  
32 the inhibitors led to preferential use of one pathway over the other. Viral variants from the two  
33 pathways showed differential selection of compensatory mutations in Gag cleavage sites. These  
34 results reveal the high-level of selective pressure that is attainable with these fourth-generation  
35 protease inhibitors, and the interplay between selection of mutations to confer resistance while  
36 maintaining viral fitness.

37

## 38 **Introduction**

39           Highly active antiretroviral therapy (HAART) against HIV-1 with combinations of three  
40 or more drugs effectively block viral replication and preclude the evolution of drug resistance.  
41 Each drug by itself can select for resistance, and successive addition of the same three drugs that  
42 together are suppressive would lead to multi-drug resistance. Thus, only fully suppressing viral  
43 replication allows successful therapy, while sub-optimal inhibition leads to selection of  
44 resistance. Accordingly, the population size of the replicating virus is an important determinant  
45 of the evolution of resistance. In an early clinical study of monotherapy with a protease  
46 inhibitor, the time to the appearance of resistance was correlated with the nadir of viral load  
47 before rebound (Kempf et al., 1998), i.e. the lower the nadir viral load, the longer the time to the  
48 appearance of resistant rebound virus. Three major factors interplay to define the emergence of  
49 resistance *in vivo*: i) the active drug concentration relative to its inhibitory activity; ii) the level  
50 of resistance conferred by one or more mutations; and iii) the fitness cost of the resistance  
51 mutations.

52           The early identification of the retroviral protease as a member of the aspartyl proteinase  
53 family and the determination of a number of cleavage site sequences led to the development of  
54 first generation inhibitors that validated the HIV-1 protease as a drug target (Katoh et al., 1987,  
55 Richards et al., 1989, Seelmeier et al., 1988). A second generation of inhibitors was quickly  
56 developed for use in humans, becoming the third drug in a three-drug regimen that achieved  
57 sustained suppression of viral load with no evolution of resistance (Gulick et al., 1997). The  
58 third generation of inhibitors had improved properties with regard to side effects and efficacy.  
59 In addition, the strategy of "boosting" protease inhibitor levels with ritonavir (RTV), which at  
60 low doses inhibits cytochrome P450-3A4 metabolizing HIV-1 PIs, allowed for increased drug

61 levels needed to inhibit replication. These properties have been further enhanced with a fourth-  
62 generation PI, darunavir (DRV), which achieves drug levels in plasma ( $>1 \mu\text{M}$ ) that is 1,000  
63 fold greater than its inhibitory activity in cell culture (Ali et al., 2010, Nalam et al., 2013,  
64 Yilmaz et al., 2009). The high efficacy of a fourth-generation inhibitor such as DRV can be  
65 inferred from an attempt to use this drug in monotherapy (Katlama et al., 2010, Pulido et al.,  
66 2011). In the cases of virologic failure there was no significant resistance to DRV in the  
67 rebound virus (Katlama et al., 2010, Pulido et al., 2011). Thus the observed rebound is most  
68 easily attributed to issues with adherence or possibly poor drug penetration in some tissues.

69 Under selective pressure, such as inhibition with small molecules, for survival the virus  
70 has to maintain a balance between mutations that confer inhibitor resistance while maintaining  
71 the enzyme's necessary catalytic function to allow viral replication. Typically, at low inhibitor  
72 concentrations a less resistant but more fit virus will be selected, while at higher inhibitor  
73 concentrations a more resistant but less fit virus may have to be selected. A clear example of  
74 this is with HIV-1 PI nelfinavir (NFV) where in patient isolates the resistance mutation D30N  
75 was typically observed, while in cell culture I84V was readily selected and provides greater  
76 resistance and cross-resistance (Grossman et al., 2004, De Meyer et al., 2005, Ntemgwa et al.,  
77 2007) but lower fitness. When resistance can only be achieved by one or more mutations that  
78 are deleterious to enzyme function, requiring the selection of additional compensatory  
79 mutations to restore fitness, such inhibitors are considered to have a high genetic barrier to  
80 resistance. Thus, it becomes increasingly difficult for virus in a small population size to survive  
81 the fitness loss long enough to accumulate the additional needed mutations, either as the  
82 population size is rapidly declining during therapy initiation or in sites where there might be  
83 low level replication on therapy.



84           We have previously designed a series of highly potent protease inhibitors, UMASS1-10,  
85   that fit within the substrate envelope, which is the shared volume occupied by natural protease  
86   substrates when bound to the active site (Nalam et al., 2013). These inhibitors are less  
87   susceptible to resistance because a mutation affecting such inhibitors will simultaneously affect  
88   substrate processing. The designed inhibitors share a common chemical scaffold with DRV but  
89   have modified chemical moieties that further fill the substrate envelope, and all bind tighter than  
90   <5 pM to purified wildtype HIV-1 protease. These inhibitors retained robust binding to many  
91   multi-drug resistant protease variants and viral strains. Thus, the substrate envelope proved to  
92   be a powerful tool to guide the design of potent and robust inhibitors, by minimizing  
93   susceptibility to resistance mutations.

94           In this study we have examined the evolutionary path that HIV-1 follows to attain high  
95   level resistance to a panel of fourth-generation PIs by selecting for resistance under conditions  
96   of escalating inhibitor concentration during viral replication in cell culture. While DRV and  
97   UMASS1-10 potently inhibit wild-type and single mutant variants, under persistent pressure of  
98   sub-optimal inhibition the virus evolves to accumulate mutations and escape inhibition. In most  
99   cases, selection was carried out until the inhibitor concentration was over 1,000 times the  
100   starting EC50, with the final concentration approximating that achieved by DRV *in vivo*. While  
101   it is possible to select for high level resistance to second and third generation protease  
102   inhibitors, these high levels of resistance are not relevant given that these drugs do not reach  
103   comparably high concentrations *in vivo* (Watkins et al., 2003). Selections against the UMASS  
104   series of protease inhibitors were performed twice, in the presence and absence of an initial pool  
105   of common single-site resistance mutations, which had a long-term impact on the sequence  
106   diversity in the culture. Resistance overall followed one of two pathways, one defined by

107 higher drug resistance but lower viral fitness and the other defined by higher viral fitness but  
108 lower drug resistance. Relatively minor modifications in inhibitor structure influenced selection  
109 of one or the other pathway to resistance, although both pathways eventually led to high levels  
110 of cross-resistance between inhibitors. The viral passaging experiments resulted in proteases  
111 with up to 14 resistance-associated mutations, and deep sequencing analysis showed persistent  
112 heterogeneity in the viral population within the culture. These results reveal the extremely high  
113 genetic barrier to resistance for fourth-generation protease inhibitors at inhibitor concentrations  
114 that can be achieved *in vivo*, and the complex evolutionary pathways required to achieve  
115 resistance.

116

## 117 **Results**

### 118 **Panel of highly potent and analogous HIV-1 protease inhibitors**

119 HIV-1 protease inhibitors were designed by modifications to DRV to increase favorable  
120 interactions within the substrate envelope thereby increasing potency while minimizing  
121 evolution of resistance (Nalam et al., 2013). A panel of ten DRV analogues were chosen with  
122 enzymatic inhibition constants ( $K_i$ ) in the single or double-digit picomolar range to wild-type  
123 NL4-3 protease and the I84V and I50V/A71V drug resistant variants, respectively [**Table 1**]  
124 (Mittal et al., 2013, Lockbaum et al., 2019). These PIs contained modified P1' positions with  
125 (S)-2-methylbutyl or 2-ethyl-n-butyl groups (R1-1 and R1-2, respectively) in combination with  
126 five diverse P2' phenyl-sulfonamides (R2-1 to R2-5), with the inhibitors named UMASS-1  
127 through -10 [**Table 1**]. These inhibitors and DRV were tested in a cell culture-based viral  
128 inhibition assay. The EC50 constants (the amount of inhibitor needed to inhibit 50% of the  
129 infectivity of the virus when the drug was present during virus production) for DRV and

130 UMASS analogues ranged from 2.4 to 9.1 nM, significantly more potent than the second and  
131 third generation protease inhibitors (**Figure S1**).

132

133 **Table 1.** Inhibition constants ( $K_i$ ) in enzymatic assays and half maximal effective  
 134 concentrations ( $EC_{50}$ ) in viral inhibition assays of DRV and analogous protease inhibitors.

| Inhibitor | Structure                                                                           | $K_i$ (pM) |            |             | $EC_{50}$ (nM) |
|-----------|-------------------------------------------------------------------------------------|------------|------------|-------------|----------------|
|           |                                                                                     | WT         | I84V       | I50V/A71V   | WT             |
| DRV       | 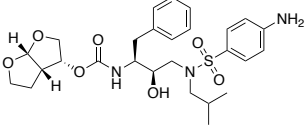   | < 5.0      | 25.6 ± 5.6 | 74.5 ± 5.6  | 7.7            |
| UMass 1   |    | < 5.0      | 26.1 ± 3.7 | 110.3 ± 8.8 | 5.9            |
| UMass 2   |    | < 5.0      | < 5.0      | 15.0 ± 2.7  | 2.4            |
| UMass 3   |    | < 5.0      | 9.9 ± 2.7  | 79.9 ± 5.9  | 9.1            |
| UMass 4   |   | < 5.0      | 10.5 ± 1.8 | 32.9 ± 3.0  | 3.2            |
| UMass 5   |  | < 5.0      | 7.0 ± 1.7  | 7.8 ± 0.9   | 4.0            |
| UMass 6   |  | < 5.0      | 12.8 ± 3.1 | 100.0 ± 9.9 | 5.2            |
| UMass 7   |  | < 5.0      | 12.1 ± 4.5 | 18.2 ± 3.0  | 3.1            |
| UMass 8   |  | < 5.0      | < 5.0      | 55.4 ± 4.0  | 4.2            |
| UMass 9   |  | < 5.0      | 7.6 ± 1.6  | 42.3 ± 2.6  | 6.4            |
| UMass 10  |  | < 5.0      | 14.3 ± 9.3 | 5.8 ± 1.1   | 4.1            |

135

### 136 **Selection for high-level resistance *in vitro***

137       To evaluate the potential of each inhibitor to select for mutations that would confer high-  
138 level resistance and to compare these mutations across analogous inhibitors, we performed viral  
139 passaging under conditions of escalating inhibitor concentration in cell culture. Virus in the  
140 cultures was periodically sequenced after selection to specific inhibitor concentrations. The  
141 selection experiments were performed under two separate starting conditions, a mixture of 26  
142 viruses with known single-site mutations associated with drug resistance in an NL4-3  
143 background, or with virus generated from only the wild-type NL4-3 clone (which closely  
144 approximates the clade B consensus sequence for the protease amino acid sequence). Notably,  
145 only about one-half of the selected mutations were present in the initial mixture, indicating that  
146 even in the selection that was seeded with the pool of resistance mutations there was sufficient  
147 evolutionary capacity to explore additional mutational space. Inhibitor/Selective pressure  
148 started at low nanomolar concentrations and increased by a factor of 1.5 with each subsequent  
149 viral passage. All of the selections starting with wild type virus reached at least 5  $\mu\text{M}$  of  
150 inhibitor concentration. For technical reasons, only 5 of the selections starting with the mixture  
151 of mutants reached an inhibitor concentration of 400 nM and are included in this report (**Figure**  
152 **S2**). To assess variability in the selection scheme, selection against DRV was replicated four  
153 separate times starting with the same mutant mixture.

154

### 155 **Two major mutational pathways to resistance determined by next generation sequencing** 156 **(NGS) of viral culture during *in vitro* selection**

157 Resistance mutations selected in the protease coding domain during the escalating  
158 selective pressure of increased protease inhibitor concentration were examined at various time-  
159 points using a next generation sequencing (NGS) protocol that included Primer ID with the  
160 MiSeq platform (Zhou et al., 2015). In this approach, individual cDNA molecules are tagged  
161 with 11 random degenerate bases in the cDNA primer to give a unique molecular identifier to  
162 each cDNA/RNA template before the PCR step, allowing quantification of the number of  
163 templates sequenced (by the number of different Primer ID identifiers recovered). A Template  
164 Consensus Sequences (TCS) was generated using the multiple reads associated with each  
165 Primer ID identifier/template, which greatly lowers the error rate. The abundance of viral RNA  
166 templates recovered from the culture supernatants made it possible to sequence thousands of  
167 templates, which validated the sampling sensitivity by detecting several copies of minor  
168 variants representing less than 0.1% of the population.

169 Each of the viral cultures showed an accumulation of protease mutations with increasing  
170 selective pressure. NGS analysis revealed very few fixed variants until the inhibitor  
171 concentration reached 3 nM, with some exceptions occurring at sub-EC50 concentrations.  
172 Multiple resistance variants were observed in relatively high abundance after the drug  
173 concentration surpassed the EC50 values above 3 nM, highlighting the high genetic diversity in  
174 the culture. Additional compensatory mutations became linked at higher drug concentrations,  
175 which was followed by a fairly stable population through the rest of the time points. An  
176 average of 6 mutations were present by the time the drug concentration reached 100 nM, while  
177 an average of 10 mutations (and up to 14) were seen for the selections that reached greater than  
178 1  $\mu$ M inhibitor concentration (**Figure S3, S4**).

179           The mutations observed in the most abundant protease variant present at the highest  
180 inhibitor concentration achieved in each selection are shown in **Figure 1**. These end-point  
181 protease variants illustrate two largely independent pathways to resistance, centered around the  
182 active site mutations I84V or I50V, although in some cases both mutations were observed.  
183 Also, the most abundant and the second most abundant genotypes in each culture typically  
184 differ by a single compensatory mutation, indicative of a necessary “backbone” of resistance  
185 mutations shared by a majority of successful variants (not shown). Finally, certain mutations are  
186 linked to one or the other pathway while others are shared (see below).

187

### 188 **Both resistance pathways confer high levels of cross-resistance to all PIs**

189           To quantify the resistance associated with each selection pathway, a subset of viruses  
190 that reached the 5  $\mu$ M inhibitor concentration in the selection cultures were chosen to be tested  
191 in an EC50 infectivity assay. The EC50 values were obtained using pools of viruses that  
192 contained mostly homogenous populations, which aimed to minimize any confounding  
193 variables in the dose-response curve, although there was some sequence heterogeneity in the  
194 cultures. The pools were sequenced and all viral pools used in the EC50 experiments had a  
195 single variant representing at least 80% of their population.

196           The viruses tested revealed EC50 values 100 to over 10,000-fold higher than WT virus  
197 (ND) across the different inhibitors [**Figure 2**]. Cross-resistance against all inhibitors was  
198 observed at high levels. The virus pool that contained both 50V and 84V mutations showed the  
199 highest levels of resistance across the panel of inhibitors. Thus, the selections were successful  
200 in generating highly resistant variants to these fourth-generation inhibitors after the  
201 accumulation of mutations in over 10% of the sequence of the protease or more.

202

### 203 **Sequence diversity (entropy) varied over the course of selection**

204       As previously mentioned, on average 6 mutations were observed at 100 nM inhibitor  
205 concentration, and on average 10 mutations were observed when the selective pressure was  
206 above 1  $\mu$ M, indicating the increasing number of mutations necessary for viability under  
207 increasing selective pressure. However, deep sequencing at selected inhibitor concentrations  
208 revealed mutations accumulated in complex patterns. We assessed the sequence complexity of  
209 each culture by calculating the Shannon Entropy to allow comparison of changes in diversity in  
210 the cultures. Entropy profiles are shown for all of the selections in **Figure 3**. When we  
211 examined the entropy values for all selections that reached 1  $\mu$ M in inhibitor concentration we  
212 found that cultures starting with the mixture of resistant viruses averaged a nearly two-fold  
213 higher entropy value compared to the cultures where the selection started with just the virus  
214 generated from the NL4-3 clone (3.0 vs 1.6,  $P < 0.0001$  Mann-Whitney test). This was  
215 unexpected, as both sets of selections passed through many genetic bottlenecks. This result is  
216 most easily explained if the rates of recombination were fairly high throughout the culture  
217 period.

218       The additional entropy plots of each individual selection with the times when mutations  
219 appeared (**Figure 3**) in the culture show the early appearance of the I84V mutation was  
220 associated with peaks in entropy, reflecting high genetic diversity, followed by a decrease in  
221 entropy when the mutation became fixed. The I50V mutation was not associated with drops in  
222 entropy when it entered the population, rather these populations maintained high genetic  
223 diversity even at higher drug concentrations. We interpret these patterns as indicative of I84V  
224 conferring some level of resistance without a dramatic loss in fitness, allowing a more



225 homogeneous culture (i.e. less entropy). In contrast, I50V confers a higher level of resistance  
226 but at a greater fitness cost, thus requiring greater diversity in the culture either as compensatory  
227 mutations or as other combinations of mutations with lesser resistance but higher fitness. We  
228 previously showed I50V significantly reduces the fitness of the virus relative to the fitness loss  
229 of a virus with I84V (Henderson et al., 2012). In contrast, I50V (with A71V) was on average  
230 significantly less sensitive to inhibition by this series of inhibitors (Table 1).

231

### 232 **Inhibitor structure influences the resistance pathway**

233        Selections were performed with 11 analogous inhibitors derived from a common  
234 scaffold (**Table 1**) (Nalam et al., 2013, Paulsen et al., 2017). We were interested to see if subtle  
235 chemical differences between the inhibitors could impact selection for different resistance  
236 pathways. We found the P1' group, either (S)-2-methylbutyl (R1-1) or 2-ethyl-n-butyl (R1-2),  
237 influenced the resistance pathway. With the UMASS 1-5 series (the smaller R1-1 group), the  
238 I84V pathway was favored. In contrast, the UMASS 6-10 series with the larger R1-2 group,  
239 favored the I50V mutation. Overall, 7 of the 8 cultures with an R1-1 inhibitor first had I84V,  
240 while 8 of 9 cultures with R1-2 had I50V ( $P=0.003$ , Fisher's Exact Test). We considered the  
241 possibility that the mixture of mutant viruses in the first selection might skew the pathway  
242 selected. However, in only 1 of the 8 cultures with sufficient data from both selections was  
243 there a switch from the I84V pathway to the I50V pathway between the first and second  
244 selections (cultures of UMASS 6 with an R1-2 group). Thus, we conclude that the P1' group of  
245 the inhibitor is a strong determinant of the pathway selected.

246        While the cultures of inhibitors with R1-1 groups favored I84V there was also some  
247 selection of I50V; this is in contrast to cultures with the R1-2 group inhibitors which strongly

248 favored the I50V pathway and excluded the I84V pathway. This preference is explained with  
249 analysis of the protease-inhibitor cocrystal structures. The R1-1 has one more methyl group  
250 than DRV which packs against residue 82, but this group loses significant vdW contacts with  
251 residue I84 due to I84V mutation. The R1-2 group has one more methyl than the R1-1 group  
252 which packs against residue 84 and thus better maintains vdW contacts [**Figure 4**] (Lockbaum  
253 et al., 2019). Similar to I84V, the I50V mutation causes a steric reduction of a residue side  
254 chain in the hydrophobic S1' pocket. Like I84V, the I50V mutation causes loss of vdW contacts  
255 with the R1-1 group, but unlike with the I84V mutation, the R1-2 is unable to accommodate the  
256 I50V mutation due to the flaps adopting a subtly different conformation in the presence of the  
257 mutation.

258 To examine the broader pattern of mutations selected based on the R1 group, the  
259 abundance data from UMASS1-5 and UMASS6-10 was pooled and examined sequentially at  
260 different levels of drug concentration. In this analysis (**Figure 5**), the mutations selected against  
261 UMASS1-5 are depicted pointing upwards, while the mutations resulting from UMASS6-10  
262 point downwards. These data show the strong preference for the I50V pathway for the R1-2-  
263 containing inhibitors, and suggest there may be specific and shared mutations in the two  
264 pathways (see below). Since the R1 group was a strong determinant of resistance pathway  
265 chosen, we did not analyze the data for the larger set of R2 groups.

266 We further explored how deterministic pathway choice was by analyzing the four  
267 replicates of DRV selection starting from a pool of 26 single resistance-associated mutation  
268 variants (**Figure S5**). In one of the cultures the virus was lost during the escalation of inhibitor  
269 concentration, suggesting the selection protocol provides strong selection pressure at or near  
270 levels that can extinguish the virus. The sequence analysis for the other three cultures showed

271 that HIV-1 can evolve DRV resistance using both pathways. Of the replicate selections, two  
272 out of the three selections followed the I84V pathway, with I50V in the remaining selection.  
273 These results show there is a stochastic element in which resistance pathway is used under these  
274 conditions of escalating selective pressure. These results are also consistent with the smallest  
275 R1 group (even smaller than in the R1-1 series) in DRV being able to use both resistance  
276 pathways, while the larger R1-2 is more selective for the I50V pathway.

277

### 278 **Linked versus shared mutations in evolution of high-level resistance through the two** 279 **pathways**

280 To examine the order in which the 8 to 14 mutations accumulated in the protease gene to  
281 confer high level resistance, and determine if there was specificity between the two pathways  
282 (I50V and I84V), the abundance data from multiple selections that ended in one or the other  
283 pathway were pooled and examined sequentially at different levels of drug concentration. In  
284 this analysis (**Figure 6**), the selections resulting in the I84V pathway point up, with I84V  
285 reaching 100% penetrance, by definition. Similarly, those selections that fixed I50V are shown  
286 pointing downward, with I50V reaching 100% penetrance.

287 The mutational data grouped by I50V and I84V penetrance show that the mutations are  
288 often close in three-dimensional space. The I84V pathway shows a strong correlation with  
289 V32I (specifically) and V82I, two hydrophobic residues that have a direct steric relationship  
290 with residue 84 and most likely participate in hydrophobic sliding [**Figure 7A**] (Foulkes-  
291 Murzycki et al., 2007, Ragland et al., 2014, Ragland et al., 2017, Mittal et al., 2012).  
292 Hydrophobic repacking has been observed when I84V mutates and adopts an alternate rotamer  
293 in the B chain which also affects the rotamer of residue 32 (Lockbaum et al., 2019). The V32I

294 mutation has been shown to work cooperatively with the L33F mutation to achieve higher levels  
295 of resistance than either mutation on their own (Ragland et al., 2014), although L33F was  
296 observed in both pathways. Active site hydrophobic packing is also altered with the I47V  
297 mutation which is selected mostly in the I50V pathway, while L76V is unique to the I84V  
298 pathway, although it appears at a low frequency. In addition to being in close proximity to  
299 I84V, the V82I mutation is also near the L10F mutation, observed in both pathways [**Figure**  
300 **7B**]. Lastly the I54L mutation has been shown to be critical in conferring very high levels of  
301 drug resistance at the expense of catalytic efficiency, which is probably why that mutation is  
302 only observed at high inhibitor concentrations (Henes et al., 2019).

303 While both pathways have an L33F mutation which adds steric bulk to the hydrophobic  
304 core of the protease, the I50V mutation uniquely utilizes the I13V mutation to relieve that steric  
305 pressure [**Figure 7B**]. Both pathways also have an M46I mutation a critical site for resistance  
306 (Ragland et al., 2014) which modulates flap dynamics. Only the I50V pathway has the F53L  
307 mutation that directly interacts with residue 46 on the outer surface of the flap, likely providing  
308 flap stability. L10I, G16E, I47A, L76S, I85V, and L89T/I mutations appear at lower frequency,  
309 making it challenging to assess if they are specific or critical to either pathway.

310 To further evaluate the loss in potency, HIV-1 protease variants with high levels of drug  
311 resistance from viral selection were chosen to span the diversity in sequence, and represent the  
312 I50V, I84V and I50V/I84V pathways. The protease variants were expressed/purified, and  
313 enzymatic activity and inhibition assayed against DRV and the ten inhibitor analogs. Although  
314 the enzymatic activity of some of the proteases is ~10-fold compromised relative to wildtype  
315 ( $\sim 17$  (s\* $\mu$ M)<sup>-1</sup>) some have retained near-WT activity (Sel-U5s-7Mut). The chosen set of 9  
316 protease variants (**Table 2**) includes 4 that contain I50V (red), 3 that contain I84V (blue), and 2

317 that have both I84V/I50V (purple). These proteases contain 6–14 mutations relative to the  
 318 wildtype enzyme, and the potency of the inhibitors has dropped from pM range to 1–100 nM  
 319 (**Figure 8**). U5 and U10 retain potency against some of the variants, but all 11 inhibitors are  
 320 compromised by two highly resistant proteases. Very high levels of resistance occur with  
 321 proteases that the contain I50V pathway variants (red), the I84V pathway variants (blue) or the  
 322 variants with both I50V/I84V (purple).

323

324 **Table 2:** Highly mutated inhibitor resistant end-point protease variants chosen to quantify  
 325 inhibitor resistance and catalytic efficiency.

|                | L  | V  | I  | I  | V  | L  | N  | K  | K  | M  | I  | I  | F  | I  | L  | I  | A  | I  | G  | T  | L  | V  | I  | I  | L  | T  | Q  | Avg. Inhib. Res. | Catalytic Eff.                              |
|----------------|----|----|----|----|----|----|----|----|----|----|----|----|----|----|----|----|----|----|----|----|----|----|----|----|----|----|----|------------------|---------------------------------------------|
|                | 10 | 11 | 13 | 15 | 32 | 33 | 37 | 43 | 45 | 46 | 47 | 50 | 53 | 54 | 63 | 66 | 71 | 72 | 73 | 74 | 76 | 82 | 84 | 85 | 89 | 91 | 92 | Ki (nM)          | Kcat/Km (s <sup>-1</sup> μM <sup>-1</sup> ) |
| Se1-U9s-6Mut   | F  |    |    |    |    |    |    |    |    | I  | V  | L  |    | P  |    |    |    | S  |    |    |    |    |    |    |    |    |    | 4.62 ± 0.51      | 3.53 ± 0.28                                 |
| Se1-U3-12Mut   | F  |    |    |    | F  |    |    |    |    | I  | V  | V  | L  | P  |    | V  |    |    |    | S  | I  |    | V  | I  |    |    |    | 24.90 ± 1.18     | 0.56 ± 0.27                                 |
| Se1-U8-10Mut   | F  |    |    |    |    |    |    |    |    | I  | V  | V  | L  | P  |    |    | V  | S  |    |    |    |    | I  | V  |    |    |    | 39.61 ± 1.98     | 1.91 ± 0.40                                 |
| Se1-U9e-14Mut  | F  | V  |    |    | F  |    |    | R  | I  | V  | V  | L  | L  |    | F  | V  |    |    | A  | S  | I  |    |    |    |    |    |    | 40.36 ± 1.82     | 0.60 ± 0.18                                 |
| Se1-U5s-7Mut   | F  |    |    | I  | F  |    |    | I  |    |    |    |    |    |    |    | V  |    |    |    |    |    | I  | V  |    |    |    |    | 3.61 ± 0.23      | 17.94 ± 0.23                                |
| Se1-DRV3-10Mut | F  |    |    | I  | F  | D  |    |    | I  |    |    |    |    | P  |    |    |    |    | S  | V  |    | V  |    | M  |    |    |    | 9.80 ± 0.82      | 9.14 ± 0.30                                 |
| Se1-U4-14Mut   | F  | I  | V  |    | I  | F  |    | T  |    | L  |    |    |    | L  |    |    | V  |    |    |    |    | I  | V  |    | M  | S  | R  | 35.38 ± 1.84     | 1.04 ± 0.40                                 |
| Se1-U2-9Mut    | I  |    |    |    | I  | F  |    |    | I  | I  |    | V  |    |    |    | V  |    |    |    |    |    | I  | V  |    |    |    |    | 14.51 ± 0.57     | 10.67 ± 0.45                                |
| Se1-U5e-10Mut  | F  |    | V  |    |    |    |    |    |    | I  | V  | V  | L  |    |    | V  |    |    |    |    |    | I  | V  |    |    | T  |    | 85.85 ± 4.47     | 1.12 ± 0.29                                 |

326

327

## 328 Analysis of Gag cleavage-site mutations

329 HIV-1 protease is responsible for cleaving 10 different substrates during viral  
 330 maturation. Although these substrates do not have high sequence identity, the amino acids  
 331 corresponding to each cleavage site have a similar/conserved size and shape when bound to  
 332 protease active site (Prabu-Jeyabalan et al., 2002). Under inhibitor selective pressure, the  
 333 protease accumulates mutations that alter the active site, which may perturb the binding affinity  
 334 and processing of substrates. As the protease mutates to confer drug resistance, certain cleavage  
 335 sites are known to co-evolve to maintain protease binding affinity and the relative rates at which  
 336 the substrates are cleaved (Doyon et al., 1996, Zhang et al., 1997, Mammano et al., 1998, Kolli  
 337 et al., 2009a, Ozen et al., 2012b). Protease-substrate coevolution particularly occurs at the

338 cleavage sites flanking the spacer peptide SP2 in Gag (NC/SP2 and SP2/p6) (Prabu-Jeyabalan et  
339 al., 2004, Kolli et al., 2006, Kolli et al., 2014, Kolli et al., 2009b, Lee et al., 2012, Ozen et al.,  
340 2011, Ozen et al., 2012a, Ozen et al., 2014a). We sequenced the protease cleavage sites  
341 encoded in the viral *gag* gene in the pools of selected viruses where the inhibitor concentration  
342 had reached a level of greater than 1  $\mu$ M [Figure 9].

343 An analysis of four cultures that had I84V as the major resistance mutation showed they all had  
344 a mutation at the NC/SP2 cleavage site at position P2, with a change from the wild type alanine  
345 amino acid to either of the larger hydrophobic amino acids valine or isoleucine. In addition,  
346 three of the four I84V cultures had a mutation at the adjacent SP2/p6 cleavage site, either at P1'  
347 (leucine to phenylalanine) or P5' (proline to leucine). Conversely, all seven cultures where the  
348 I50V mutation was the major resistance mutation there was a mutation in the SP2/p6 cleavage  
349 site, but not in the NC/SP2 site. Four of the seven cultures had leucine to phenylalanine  
350 mutations at the P1' position, two had proline to leucine mutations at the P5' position, and one  
351 had both of these mutations together. Finally, in the three cultures where the protease evolved  
352 both the I50V and I84V mutations, Gag mutations were observed only at the SP2/p6 cleavage  
353 site. One culture had the proline to leucine mutation at the P5' position, while the other two had  
354 both the P1' (leucine to phenylalanine) and P5' (proline to leucine) mutations.

355         The patterns of protease-substrate coevolution from these cultures suggest two  
356 phenomena are at work. First, P2 mutations in the NC/SP2 cleavage site are compensatory for  
357 the I84V resistance mutation but are likely to be antagonistic for the I50V mutation, since they  
358 do not appear in the cultures with I50V either alone or in combination with I84V. Second, the  
359 effects of the SP2/p6 mutations at the P1' and P5' positions may be mechanistically related. The  
360 P1' leucine to phenylalanine mutation increases the size of the P1' side chain and thus occupies

361 more space in the S1' subsite of the protease. Combining the I84V and I50V selections, nine of  
362 ten cases have either the SP2/p6 P1' or the P5' position is mutated, with only one I50V culture  
363 where they appear together. This suggests the proline to leucine P5' mutation may indirectly  
364 increase wild type P1' leucine interactions with the S1' subsite. Consistent with this, we  
365 previously found by solving crystal structures that the proline to leucine mutation at the P5'  
366 position causes a distal conformational change in the protease flap and alters substrate–protease  
367 interactions (Ozen et al., 2014b). When both I50V and I84V were present in the protease  
368 together, the P1' and P5' mutations appeared together (in 2 of 3 cultures), which we would  
369 predict further increased S1' subsite interactions to compensate for the smaller amino acids at  
370 both protease residues, 50 and 84.

371 Previous work has shown that the I84V variant will more rapidly cleave NC/SP2 when  
372 alanine is mutated to valine at position P2 (Kolli et al., 2009a). I50V was also shown to cleave  
373 the SP2/p6 site more rapidly when leucine is mutated to phenylalanine at position P1' and when  
374 proline is mutated to leucine at position P5' (Ozen et al., 2014b). To understand the molecular  
375 basis of HIV-1 protease coevolution with SP2/p6 cleavage site mutations, crystal structures  
376 were examined. In our model, when alanine was substituted for valine, we observed that the P2  
377 residue in the NC/SP2 site occupies the vdW space in the substrate pocket previously filled with  
378 a methyl group on isoleucine at position 84 of protease. This mutation is not observed in the  
379 I50V pathway, possibly due to the fact that the isoleucine does not occupy the same space.  
380 However, the SP2/p6 cleavage site mutations in P1' and P5' the I50V pathway result in  
381 increased cleavage of SP2/p6, which would provide more starting product required for cleavage  
382 of the NC/SP2 site, the least active site in all of Gag. Analyses of the protease–substrate  
383 interactions indicated that restoration of active site dynamics is an additional constraint in the

384 selection of coevolved mutations. Additionally, compensatory coevolved mutations such as  
385 ProP5'Leu in the substrate do not directly restore interactions lost due to protease mutations but  
386 induce distal changes. Hence, protease–substrate coevolution permits mutational, structural,  
387 and dynamic changes via molecular mechanisms that involve distal effects contributing to drug  
388 resistance.

389

390 **Patterns of mutation beyond protease and cleavage sites that occur during resistance**  
391 **selection.**

392         When HIV-1 evolves drug resistance, resistance is being evolved by the whole viral  
393 system in the environment where the virus is replicating. Thus although HIV-1 protease  
394 inhibitors target the viral protease, for viruses to attain high level resistance the entire virus  
395 likely adapts to this selective pressure. Over recent years there have been a number of reports  
396 of site mutations in the cleavage sites as well as other locations within the Gag polyprotein and  
397 potentially Env gp41 (Doyon et al., 1996, Cote et al., 2001, Prabu-Jeyabalan et al., 2004, Kolli  
398 et al., 2006, Banke et al., 2009, Dam et al., 2009, Parry et al., 2011). However the mechanism  
399 by which these changes contribute to protease inhibitor drug resistance (Rabi et al., 2013) or  
400 how co-evolution may otherwise compensate as the virus acquires high levels of drug resistance  
401 is unknown.

402         Our viral selection experiments provide a unique opportunity to examine both the  
403 mutations that occur both within the protease gene, and throughout the viral genome and  
404 potential alterations in host response. Given the large number of selections performed we can  
405 begin to elucidate the role of compensatory changes outside protease. Mutations that were  
406 observed in more than 2 selections and/or involved a change in charge (shaded yellow) are



407 shown in **Figure 10**, with reversions to consensus subtype B or mutations observed in the no-  
408 drug control (i.e. simply adaptation to tissue culture passage) not included. Overall this involved  
409 changes at 99 different sites: 31 sites in Gag, 29 sites in RT/integrase, 30 sites in Envelope  
410 (Env) and 9 in Vif. Only 5 changes were in cleavage sites, one in Nucleocapsid and 4 in p6  
411 (**Figure 9**). Approximately 35% of the selection-associated mutations are consistent with  
412 APOBEC3G/F (A3G/F) driven mutations. In total, 48 sites involved changes in charge, most  
413 often making the resistant selected virus more positively charged. A total of 14 mutations were  
414 observed in five or more drug selection experiments; these include: Capsid (V27I, Q67H,  
415 P207S); Nucleocapsid (*R32K*); p6 (L1F, P5L, F17S); RT (*E194K*, *D237N*, *E297K*); Integrase  
416 (*D6H*, *D41N*, M154I) and Vif (I31N) – (italics indicate likely APOBEC mutations, underlined  
417 previously reported, and bold cleavage site mutation).

418         The Capsid mutation H87Q in the cyclophilin A (CypA) loop is well-known and allows  
419 HIV-1 to escape the Trim5 $\alpha$  restriction factor (Kootstra et al., 2007, Bosco et al., 2010). We  
420 observed this mutation in our passaging experiments, including in the no-drug control indicating  
421 an adaptation to cell culture (data not shown). Three other mutations were observed in 5 or more  
422 of the viral drug selections in Capsid (V27I, Q67H, P207S) as described above. Using the  
423 available crystal and cryoEM structures (Bhattacharya et al., 2014, Zhao et al., 2013), we analyzed  
424 where these three positions are physically located within the Capsid structure (Fig 11). All three  
425 sites appear to be at pivotal locations: V27I is located in a region between the N and C-terminal  
426 domains, facing a hydrophobic region that is not optimally packed (Fig 11). The V27I mutation  
427 may improve this packing and was previously observed to rescue infectivity (Rong et al., 2001).  
428 This pocket is also targeted by a number of antiretroviral inhibitors which also elicit resistance as  
429 V27A/I (Lemke et al., 2012). Q67H is located on a capsid-capsid interface within the capsid

430 hexamer. Modeling suggests that Q67H may act by improving inter-capsid monomer interactions  
431 with Y169' and by forming intramolecular hydrogen bonds with Q63. Q67H was previously  
432 observed to both confer resistance and enhance infectivity (Shi et al., 2015) to PF-3450074 (PF74)  
433 which targets capsid assembly. P207S is located prominently at the pentameric interface between  
434 capsid hexamers of the viral structure. Structurally, P207S can potentially form either direct or  
435 water-mediated hydrogen bonds with the other subunits. The P207S mutation has been identified  
436 as critical for evading the host restriction factors MxB (Busnadiago et al., 2014) and possibly  
437 SUN2 (Donahue et al., 2016). Thus all three mutations we observed frequently within resistant  
438 viruses have been previously associated with enhanced infectivity often by evading host factors.  
439

#### 440 **Discussion**

441 The development of anti-HIV-1 therapeutics has been a successful endeavor to control  
442 viral replication and restore long term health to those living with HIV-1. To prevent the  
443 emergence of resistance, combination therapies targeting multiple viral targets (RT, PR, IN) are  
444 successfully used in the clinic. However, rather than the number of targets, the combined  
445 potency of the drugs is important to effectively suppress viral replication. The initial  
446 demonstration of suppressive therapy was accomplished with three drugs directed at two  
447 targets. As the potency of the individual inhibitors has increased there has been an interest in  
448 exploring reducing the number of drugs in a regimen. This includes initial suppression with a  
449 combination of three drugs then maintenance therapy with fewer drugs. To date attempts at  
450 maintenance with a single potent drug, an HIV-1 protease inhibitor, have been partially  
451 successful ,with some people maintaining suppression while others experience virologic

452 rebound (Katlama et al., 2010, Pulido et al., 2011). Since incomplete suppression leads to  
453 resistance, any strategy that can cause virologic failure/rebound is not tenable.

454 Virologic failure can result from several causes. In one case the virus is able to replicate  
455 in the presence of subinhibitory concentrations of drug and evolve resistance, which leads to  
456 higher levels of replication. This situation is easily recognized by the presence of resistance  
457 mutations in the target gene. In another case there can be failure due to poor adherence leading  
458 to uncontrolled virus growth and viral rebound without the presence of resistance mutations. A  
459 more confusing situation is rebound without resistance mutations but under circumstances  
460 where there is reason to believe adherence was high. The first two cases can be distinguished  
461 by the presence or absence of resistance mutations, while the last case is a challenge to account  
462 for. It is worth knowing that when DRV was clinically tested in monotherapy 85% of  
463 participants maintained virologic suppression and those who did experience virologic failure  
464 had no evidence of significant DRV resistance (Katlama et al., 2010, Pulido et al., 2011).

465 DRV and the UMASS series of inhibitors have EC<sub>50</sub> values in the range of 1-10 nM in  
466 cell culture, and DRV reaches a level of >1 $\mu$ M as the maximum plasma concentration *in vivo*,  
467 in the range of 1000-fold over the EC<sub>50</sub>. In this manuscript we have selected for resistance to  
468 DRV and to 10 analogues of DRV with similar or increased potency to the drug levels that can  
469 be achieved *in vivo*. To select for viral replication at this level of drug the viral protease  
470 incorporated between 8 and 14 mutations, remodeling over 10% of its entire sequence. In  
471 culture this was achieved over 50-60 passages of the virus under conditions of escalating drug  
472 concentration to allow the sequential addition of mutations. This is not how the virus  
473 experiences drug selective pressure *in vivo*. There exposure to high levels of drug (relative to  
474 the EC<sub>50</sub>) is achieved quickly and largely sustained. Under these circumstances there is no

475 opportunity for the virus to undergo the significant evolution required to fix the large number of  
476 mutations needed for resistance to DRV. The near absence of resistance mutations in the  
477 virologic failures in the DRV monotherapy trial (Katlama et al., 2010, Pulido et al., 2011)  
478 suggests that there were selective problems with adherence in that arm, that the drug was  
479 differentially metabolized in a subset of people such that there was virtually no systemic drug  
480 exposure to the virus, or that there were compartments within the body that had very low drug  
481 exposure and allowed the production of enough virus to appear in the blood as virologic failure.  
482 Given the extremely large differential of EC50 and blood drug concentration it will be  
483 important to distinguish among these reasons for virologic failure as dual therapy combinations  
484 are entertained.

485         We tested 10 DRV analogues for pathways to resistance, in addition to DRV. Mutations  
486 accumulated over most of the course of the increasing selective pressure and revealed two  
487 distinct pathways to high-level resistance, i.e. the major resistance mutation I50V or I84V.  
488 Replicate selections showed that HIV-1 can evolve PI resistance to these inhibitors using both  
489 pathways, confirming that selections with the same inhibitor can produce different outcomes  
490 and that variants maintain a dynamic behavior over the course of a selection. However, with the  
491 largest P1'-equivalent moiety we found a strong preference for the I50V pathway while the  
492 smaller P1'-equivalent moieties were able to utilize either the I50V or the I84V pathway to high  
493 level resistance. In the first set of selections the I50V mutation was not included in the starting  
494 mixture, while the second selection was started with a homogeneous unmutated population.  
495 Thus these cultures were not limited in their ability to select among the familiar resistance  
496 mutation pathways even with different starting points. Selection to  $>1 \mu\text{M}$  inhibitor  
497 concentration resulted in broad cross resistance across the entire panel of inhibitors.

498           Although these pathways generally developed independently, they are not mutually  
499 exclusive. Several highly-selected cultures assembled linked “hybrid” variants with both I50V  
500 and I84V at the higher drug concentrations. Although there were only a few examples of this,  
501 they appeared to add I84V into the I50V pathway rather than the reverse.

502           In all of the cultures with the early appearance of the I84V mutation, this was coincident  
503 with or quickly followed by the addition of a mutation at position 32. Mutation V32I surfaced  
504 early in each culture, simultaneously or after the mutation at I84V. Mutations selected at the  
505 highest drug concentrations show I84V linked to mutations at positions 10, 33, 46, 71, and 82.  
506 Early appearance of mutations at I84V are associated with peaks in entropy, reflecting high  
507 diversity at that time point. This was followed by a decrease in entropy when the mutation  
508 becomes fixed as other populations died off. There appears to be a temporal order in one  
509 pathway where I50V is added first followed by I47V then F53L and I13V (or I85V). The I50V  
510 mutation was not associated with drops in entropy like the 84V mutation, and was followed by  
511 an increase entropy with higher drug concentrations. The selection for specific mutations could  
512 be interpreted based on structural studies.

513           Protease cleavage site mutations are known to coevolve with protease inhibitor  
514 resistance within the protease itself REF. The two resistance pathways were associated with  
515 distinctive patterns of evolution within the NC/SP2 and SP2/p6 cleavage sites (Doyon et al.,  
516 1996, Zhang et al., 1997, Mammano et al., 1998). The NC/SP2 site has a suboptimal alanine at  
517 the P2 site in the cleavage site sequence, with the resistance associated mutation placing a more  
518 favorable valine or isoleucine in that position to make the cleavage site sequence more  
519 favorable (Potempa et al., 2018). This interaction can be accounted for in the structure of  
520 protease bound to substrate. However, selection at this position does not occur in the I50V

521 pathway, even in those viruses where both I50V and I84V are present, suggesting an  
522 antagonistic effect on I50V or an absence of any benefit in cleavage site rate with this P2  
523 change. In contrast, the mutations in the P1' site and the P5' site seem to have similar effects  
524 even though the P5' change is outside of the cleavage recognition sequence. The P1' change in  
525 the SP2/p6 site is leucine to phenylalanine, with larger hydrophobic amino acids in the P1'  
526 position being preferred (Pettit et al., 2002). The P5' change in this site from proline to leucine  
527 must effect a similar change by allowing the P1' leucine to move further into the S1' subsite to  
528 improve the rate of cleavage. In the most resistant viruses, with both I50V and I84V, both the  
529 P1' and P5' mutations appeared together.

530 We found an array of mutations across the genome in the resistant viruses. The presence  
531 of mutations that appear to be the result of APOBEC3G modifications suggest the cultures went  
532 through significant bottlenecks to fix these likely deleterious mutations. In contrast, some  
533 sequence changes represented reversion to the consensus subtype B mutations, suggesting  
534 selection for improved fitness. A more interesting set of mutations were in the capsid sequence  
535 frequently appearing at subunit interfaces. This raises the possibility that one of the  
536 compensatory mechanisms of a less active protease may be in the subunit recognition/assembly  
537 of the capsid.

538 In this manuscript we have examined the evolutionary pathways that confer high level  
539 resistance to DRV and a series of DRV variants. We showed that resistance to the level of  
540 DRV that is achieved in plasma *in vivo* requires extensive mutagenesis both within the outside  
541 of the protease. These levels of evolution are not attainable during the rapid decline of the viral  
542 population size with the initiation of multidrug therapy nor likely to occur during sporadic,  
543 isolated viral replication in tissue. While monotherapy even with potent drugs has not been as

544 robust in achieving viral suppression as triple drug therapy, there is potential for two drug  
545 therapies. To date dual therapy often includes the nucleoside analog 3TC which has a very low  
546 genetic barrier (a single mutation M184V in RT). A more reasonable strategy would be to pair  
547 two drugs where both drugs have a high genetic barrier, with a protease inhibitor such as DRV  
548 as an obvious choice. Finally, given the high level of drug that can be obtained in the blood  
549 there is the potential to use DRV as a platform for a fifth generation of protease inhibitors that  
550 have additional properties such as reduced protein binding or enhance blood-brain-barrier  
551 penetration.  
552

553 **Materials and Methods**

554 **Cell lines and viruses.**

555 CEMx174 cells were maintained in RPMI 1640 medium with 10% fetal calf serum and  
556 penicillin-streptomycin. TZM-bl and 293T cells were maintained in Dulbecco's modified  
557 Eagle-H medium supplemented with 10% fetal calf serum and penicillin-streptomycin.  
558 CEMx174 cell line was obtained from the National Institutes of Health AIDS Research and  
559 Reference Reagent Program. A wild-type virus stock NL4-3 was prepared by transfection of  
560 the pNL4-3 plasmid (purified using the Qiagen plasmid Maxikit ) into HeLa cells.

561

562 **Selections.**

563 An aliquot of  $3 \times 10^6$  CEMx174 cells was incubated at 37°C for 2 to 3 h with 250 µl of a virus  
564 stock generated from the HIV-1 infectious molecular clone pNL4-3. The culture volume was  
565 then brought to 10 ml with RPMI medium. Each flask received one of the following inhibitors  
566 at escalating concentrations: UMass1, UMass2, UMass3, UMass4, UMass5, UMass6, UMass7,  
567 UMass8, UMass9, UMass10, DRV and no drug (ND). After 48 h and every 48 h after, the cells  
568 were pelleted by centrifugation and 10ml of fresh medium and inhibitors were added. When the  
569 culture had undergone extensive cytopathic effect (CPE) indicative of viral replication, the  
570 supernatant medium and the cells were harvested separately and stored at -80°C. The virus-  
571 containing supernatant was used to start the next round of infection, and after several rounds at  
572 the initial concentration, the inhibitor concentration was increased 1.5-fold at each subsequent  
573 round of virus passage. The level of resistance (50% inhibitory concentration [EC50]) of the  
574 single inhibitor-selected virus pools was determined by a TZM infection assay in which the



575 protease inhibitor is added to productively infected cells and the titers of supernatant virus made  
576 in the presence of the inhibitor are determined.

577

### 578 **TZM Infection Assay**

579 Protease inhibitor dilutions were prepared by taking 10  $\mu$ M stocked and performing a 5-fold  
580 serial dilution using RPMI media (final drug concentration is 100  $\mu$ M). One dilution of drug  
581 was added to each well of a 24 well plate and repeated so each virus would have a full set of  
582 dilutions. Viruses for the assay were made by seeding  $3 \times 10^6$  CEM cells in a 24 well plate and  
583 incubating with 250  $\mu$ l of virus at 37°C for 2 to 3 h before bringing the culture to 10ml with  
584 RPMI media. After 48 h the medium was changed and repeated every 48 h after until the  
585 culture had undergone CPE. Infected CEM cells were collected and diluted so that 1ml of cells  
586 could be plated in each well containing a unique drug dilution. Then 24 hours later the virus  
587 supernatant was collected from each well followed by filtering through a 0.45  $\mu$ M filter then  
588 placed in -80°C. Viruses were thawed and added to 96 well plates in triplicate. TZM-bl cells  
589 were collected and diluted to a concentration of  $2 \times 10^5$  cells/ml, 100  $\mu$ l were added on top of the  
590 pre-plated viruses. Plates were kept in 37°C, 5% CO<sub>2</sub> in an incubator for 48 hours. After 48  
591 hours, the cells in the plates were lysed by removing the medium, washing two times with 100  
592  $\mu$ l PBS and then lysed with 1x lysis buffer (made from 5x Promega Firefly Lysis Buffer).  
593 Plates were frozen for at least 24 hours and then thawed for 2 hours before analyzing with  
594 Promega Firefly Luciferase Kit on a luminometer.

595

### 596 **DNA preparation and amplification of the protease-coding region.**

597 Total cellular DNA was isolated from infected cell pellets by using the QIAamp blood kit  
598 (Qiagen). The protease-coding domain of viral DNA was amplified by nested PCR. The PCR  
599 conditions are available on request. PCR products were purified by using QIAquick PCR  
600 purification kit (Qiagen) and directly sequenced or cloned into the pT7Blue vector (Novagen)  
601 and sequenced.

602

### 603 **Primer-ID Deep Sequencing of viral RNA**

604 We used the PID protocol to prepare MiSeq PID libraries with multiplexed primers. Viral RNA  
605 was extracted from plasma samples using the QIAamp viral RNA mini kit (Qiagen, Hilden,  
606 Germany). Complementary DNA (cDNA) was synthesized using a cDNA primer mixture  
607 targeting protease (PR) with a block of random nucleotides in each cDNA primer serving as the  
608 PID, and SuperScript III RT (ThermoFisher). After 2 rounds of bead purification of the cDNA,  
609 we amplified the cDNA using a mixture of a forward primer that targeted the upstream coding  
610 region, followed by a second round of PCR to incorporate the Illumina adaptor sequences. Gel-  
611 purified libraries were pooled and sequenced using the MiSeq 300 base paired-end sequencing  
612 protocol (Illumina). The sequencing covered the HIV-1 PR region (HXB2 2648–2914, 3001–  
613 3257).

614 We used the Illumina bcl2fastq pipeline for the initial processing and constructed  
615 template consensus sequences (TCSs) with TCS pipeline version 1.33  
616 (<https://github.com/SwanstromLab/PID>). We then aligned TCSs to an HXB2 reference to  
617 remove sequences not at the targeted region or that had large deletions.

618

### 619 **Protease expression and purification**

620 The highly mutated, resistant, protease variant genes were purchased on a pET11a plasmid with  
621 codon optimization for protein expression in *E. coli* (Genewiz). A Q7K mutation was included  
622 to prevent autoproteolysis (Rose et al., 1993). The expression, isolation, and purification of WT  
623 and mutant HIV-1 proteases used for enzymatic assays were carried out as previously described  
624 (Ozen et al., 2014b, King et al., 2002, Henes et al., 2019). Briefly, the gene encoding the  
625 desired HIV-1 protease was subcloned into the heat-inducible pXC35 expression vector  
626 (ATCC) and transformed into *E. coli* TAP-106 cells. Cells grown in 6 L of Terrific Broth were  
627 lysed with a cell disruptor twice, and the protein was purified from inclusion bodies (Hui et al.,  
628 1993). Inclusion bodies, isolated as a pellet after centrifugation, were dissolved in 50% acetic  
629 acid followed by another round of centrifugation at 19,000 rpm for 30 minutes to remove  
630 insoluble impurities. Size exclusion chromatography was carried out on a 2.1-L Sephadex G-75  
631 Superfine (Sigma Chemical) column equilibrated with 50% acetic acid to separate high  
632 molecular weight proteins from the desired protease. Pure fractions of HIV-1 protease were  
633 refolded using a 10-fold dilution of refolding buffer (0.05 M sodium acetate at pH 5.5, 5%  
634 ethylene glycol, 10% glycerol, and 5 mM DTT). Folded protein was concentrated to 0.5–3  
635 mg/ml and stored. The stored protease was used in  $K_M$  and  $K_i$  assays.

636

### 637 **Enzymatic Assays**

638 ***K<sub>m</sub> Assay.***  $K_m$  values were determined as previously described (Lockbaum et al., 2019, Henes et  
639 al., 2019, Windsor and Raines, 2015, Matayoshi et al., 1990). Briefly, a 10-amino acid  
640 substrate containing the natural MA/CA cleavage site with an EDANS/DABCYL FRET pair  
641 was dissolved in 8% DMSO at 40 nM and 6% DMSO at 30 nM. The 30 nM substrate was 4/5  
642 serially diluted from 30 nM to 6 nM. HIV-1 protease was diluted to 120 nM and, and 5  $\mu$ l were

643 added to the 96-well plate to obtain a final concentration of 10 nM. Fluorescence was observed  
644 using a PerkinElmer Envision plate reader with an excitation at 340 nm and emission at 492 nm,  
645 and monitored for 200 counts. A FRET inner filter effect correction was applied as previously  
646 described (Liu et al., 1999). Data corrected for the inner filter effect was analyzed with Prism7.

647

648 ***K<sub>i</sub> Assay.*** Enzyme inhibition constants ( $K_i$  values) were determined as previously described  
649 (Lockbaum et al., 2019, Henes et al., 2019, Windsor and Raines, 2015, Matayoshi et al., 1990).

650 Briefly, in a 96-well plate, inhibitors were serially diluted down from 2000-10,000 nM

651 depending on protease resistance. All samples were incubated with 5 nM protein for 1 hour. A

652 10-amino acid substrate containing an optimized protease cleavage site (Windsor and Raines,

653 2015), purchased from Bachem, with an EDANS/DABCYL FRET pair was dissolved in 4%

654 DMSO at 120 mM. Using a PerkinElmer Envision plate reader, 5  $\mu$ l of the 120 mM substrate

655 were added to the 96-well plate to a final concentration of 10 mM. Fluorescence was observed

656 with an excitation at 340 nm and emission at 492 nm and monitored for 200 counts. Data was

657 analyzed with Prism7.

658

## 659 References

660

- 661 ALI, A., BANDARANAYAKE, R. M., CAI, Y., KING, N. M., KOLLI, M., MITTAL, S.,  
662 MURZYCKI, J. F., NALAM, M. N., NALIVAICA, E. A., OZEN, A., PRABU-  
663 JEYABALAN, M. M., THAYER, K. & SCHIFFER, C. A. 2010. Molecular Basis for  
664 Drug Resistance in HIV-1 Protease. *Viruses*, 2, 2509-35.
- 665 BANKE, S., LILLEMAR, M. R., GERSTOFT, J., OBEL, N. & JORGENSEN, L. B. 2009.  
666 Positive selection pressure introduces secondary mutations at Gag cleavage sites in  
667 human immunodeficiency virus type 1 harboring major protease resistance mutations. *J*  
668 *Virol*, 83, 8916-24.
- 669 BHATTACHARYA, A., ALAM, S. L., FRICKE, T., ZADROZNY, K., SEDZICKI, J.,  
670 TAYLOR, A. B., DEMELER, B., PORNILLOS, O., GANSER-PORNILLOS, B. K.,  
671 DIAZ-GRIFFERO, F., IVANOV, D. N. & YEAGER, M. 2014. Structural basis of HIV-  
672 1 capsid recognition by PF74 and CPSF6. *Proc Natl Acad Sci U S A*, 111, 18625-30.
- 673 BOSCO, D. A., EISENMESSER, E. Z., CLARKSON, M. W., WOLF-WATZ, M.,  
674 LABEIKOVSKY, W., MILLET, O. & KERN, D. 2010. Dissecting the microscopic  
675 steps of the cyclophilin A enzymatic cycle on the biological HIV-1 capsid substrate by  
676 NMR. *J Mol Biol*, 403, 723-38.
- 677 BUSNADIEGO, I., KANE, M., RIHN, S. J., PREUGSCHAS, H. F., HUGHES, J., BLANCO-  
678 MELO, D., STROUVELLE, V. P., ZANG, T. M., WILLETT, B. J., BOUTELL, C.,  
679 BIENIASZ, P. D. & WILSON, S. J. 2014. Host and viral determinants of Mx2  
680 antiretroviral activity. *J Virol*, 88, 7738-52.
- 681 COTE, H. C., BRUMME, Z. L. & HARRIGAN, P. R. 2001. Human immunodeficiency virus  
682 type 1 protease cleavage site mutations associated with protease inhibitor cross-  
683 resistance selected by indinavir, ritonavir, and/or saquinavir. *J Virol*, 75, 589-94.
- 684 DAM, E., QUERCIA, R., GLASS, B., DESCAMPS, D., LAUNAY, O., DUVAL, X.,  
685 KRAUSSLICH, H. G., HANCE, A. J., CLAVEL, F. & GROUP, A. S. 2009. Gag  
686 mutations strongly contribute to HIV-1 resistance to protease inhibitors in highly drug-  
687 experienced patients besides compensating for fitness loss. *PLoS Pathog*, 5, e1000345.
- 688 DE MEYER, S., AZIJN, H., SURLERAUX, D., JOCHMANS, D., TAHRI, A., PAUWELS, R.,  
689 WIGERINCK, P. & DE BETHUNE, M. P. 2005. TMC114, a novel human  
690 immunodeficiency virus type 1 protease inhibitor active against protease inhibitor-  
691 resistant viruses, including a broad range of clinical isolates. *Antimicrob Agents*  
692 *Chemother*, 49, 2314-21.
- 693 DONAHUE, D. A., AMRAOUI, S., DI NUNZIO, F., KIEFFER, C., PORROT, F., OPP, S.,  
694 DIAZ-GRIFFERO, F., CASARTELLI, N. & SCHWARTZ, O. 2016. SUN2  
695 Overexpression Deforms Nuclear Shape and Inhibits HIV. *J Virol*, 90, 4199-4214.
- 696 DOYON, L., CROTEAU, G., THIBEAULT, D., POULIN, F., PILOTE, L. & LAMARRE, D.  
697 1996. Second locus involved in human immunodeficiency virus type 1 resistance to  
698 protease inhibitors. *J Virol*, 70, 3763-9.
- 699 FOULKES-MURZYCKI, J. E., SCOTT, W. R. & SCHIFFER, C. A. 2007. Hydrophobic  
700 sliding: a possible mechanism for drug resistance in human immunodeficiency virus  
701 type 1 protease. *Structure*, 15, 225-33.

- 702 GROSSMAN, Z., PAXINOS, E. E., AVERBUCH, D., MAAYAN, S., PARKIN, N. T.,  
703 ENGELHARD, D., LORBER, M., ISTOMIN, V., SHAKED, Y., MENDELSON, E.,  
704 RAM, D., PETROPOULOS, C. J. & SCHAPIRO, J. M. 2004. Mutation D30N is not  
705 preferentially selected by human immunodeficiency virus type 1 subtype C in the  
706 development of resistance to nelfinavir. *Antimicrob Agents Chemother*, 48, 2159-65.
- 707 GULICK, R. M., MELLORS, J. W., HAVLIR, D., ERON, J. J., GONZALEZ, C.,  
708 MCMAHON, D., RICHMAN, D. D., VALENTINE, F. T., JONAS, L., MEIBOHM, A.,  
709 EMINI, E. A. & CHODAKEWITZ, J. A. 1997. Treatment with indinavir, zidovudine,  
710 and lamivudine in adults with human immunodeficiency virus infection and prior  
711 antiretroviral therapy. *N Engl J Med*, 337, 734-9.
- 712 HENDERSON, G. J., LEE, S. K., IRLBECK, D. M., HARRIS, J., KLINE, M., POLLOM, E.,  
713 PARKIN, N. & SWANSTROM, R. 2012. Interplay between single resistance-associated  
714 mutations in the HIV-1 protease and viral infectivity, protease activity, and inhibitor  
715 sensitivity. *Antimicrob Agents Chemother*, 56, 623-33.
- 716 HENES, M., LOCKBAUM, G. J., KOSOVRASTI, K., LEIDNER, F., NACHUM, G. S.,  
717 NALIVAIIKA, E. A., LEE, S. K., SPIELVOGEL, E., ZHOU, S., SWANSTROM, R.,  
718 BOLON, D. N. A., KURT YILMAZ, N. & SCHIFFER, C. A. 2019. Picomolar to  
719 Micromolar: Elucidating the Role of Distal Mutations in HIV-1 Protease in Conferring  
720 Drug Resistance. *ACS Chem Biol*.
- 721 HUI, J. O., TOMASSELLI, A. G., REARDON, I. M., LULL, J. M., BRUNNER, D. P.,  
722 TOMICH, C. S. & HEINRIKSON, R. L. 1993. Large scale purification and refolding of  
723 HIV-1 protease from Escherichia coli inclusion bodies. *J Protein Chem*, 12, 323-7.
- 724 KATLAMA, C., VALANTIN, M. A., ALGARTE-GENIN, M., DUVIVIER, C., LAMBERT-  
725 NICLOT, S., GIRARD, P. M., MOLINA, J. M., HOEN, B., PAKIANATHER, S.,  
726 PEYTAVIN, G., MARCELIN, A. G. & FLANDRE, P. 2010. Efficacy of  
727 darunavir/ritonavir maintenance monotherapy in patients with HIV-1 viral suppression:  
728 a randomized open-label, noninferiority trial, MONOI-ANRS 136. *AIDS*, 24, 2365-74.
- 729 KATOH, I., YASUNAGA, T., IKAWA, Y. & YOSHINAKA, Y. 1987. Inhibition of retroviral  
730 protease activity by an aspartyl proteinase inhibitor. *Nature*, 329, 654-6.
- 731 KEMPF, D. J., RODE, R. A., XU, Y., SUN, E., HEATH-CHIOZZI, M. E., VALDES, J.,  
732 JAPOUR, A. J., DANNER, S., BOUCHER, C., MOLLA, A. & LEONARD, J. M. 1998.  
733 The duration of viral suppression during protease inhibitor therapy for HIV-1 infection  
734 is predicted by plasma HIV-1 RNA at the nadir. *AIDS*, 12, F9-14.
- 735 KING, N. M., MELNICK, L., PRABU-JEYABALAN, M., NALIVAIIKA, E. A., YANG, S. S.,  
736 GAO, Y., NIE, X., ZEPP, C., HEEFNER, D. L. & SCHIFFER, C. A. 2002. Lack of  
737 synergy for inhibitors targeting a multi-drug-resistant HIV-1 protease. *Protein Sci*, 11,  
738 418-29.
- 739 KOLLI, M., LASTERE, S. & SCHIFFER, C. A. 2006. Co-evolution of nelfinavir-resistant  
740 HIV-1 protease and the p1-p6 substrate. *Virology*, 347, 405-409.
- 741 KOLLI, M., OZEN, A., KURT-YILMAZ, N. & SCHIFFER, C. A. 2014. HIV-1 protease-  
742 substrate coevolution in nelfinavir resistance. *J. Virol.*, 88, 7145-7154.
- 743 KOLLI, M., STAWISKI, E., CHAPPEY, C. & SCHIFFER, C. A. 2009a. Human  
744 immunodeficiency virus type 1 protease-correlated cleavage site mutations enhance  
745 inhibitor resistance. *J Virol*, 83, 11027-42.

- 746 KOLLI, M., STAWISKI, E., CHAPPEY, C. & SCHIFFER, C. A. 2009b. Human  
747 immunodeficiency virus type 1 protease-correlated cleavage site mutations enhance  
748 inhibitor resistance. *J. Virol.*, 83, 11027–11042.
- 749 KOOTSTRA, N. A., NAVIS, M., BEUGELING, C., VAN DORT, K. A. & SCHUITEMAKER,  
750 H. 2007. The presence of the Trim5alpha escape mutation H87Q in the capsid of late  
751 stage HIV-1 variants is preceded by a prolonged asymptomatic infection phase. *AIDS*,  
752 21, 2015-23.
- 753 LEE, S. K., POTEMPA, M., KOLLI, M., OZEN, A., SCHIFFER, C. A. & SWANSTROM, R.  
754 2012. Context surrounding processing sites is crucial in determining cleavage rate of a  
755 subset of processing sites in HIV-1 Gag and Gag-Pro-Pol polyprotein precursors by viral  
756 protease. *J. Biol. Chem.*, 287, 13279–13290.
- 757 LEMKE, C. T., TITOLO, S., VON SCHWEDLER, U., GOUDREAU, N., MERCIER, J. F.,  
758 WARDROP, E., FAUCHER, A. M., COULOMBE, R., BANIK, S. S., FADER, L.,  
759 GAGNON, A., KAWAI, S. H., RANCOURT, J., TREMBLAY, M., YOAKIM, C.,  
760 SIMONEAU, B., ARCHAMBAULT, J., SUNDQUIST, W. I. & MASON, S. W. 2012.  
761 Distinct effects of two HIV-1 capsid assembly inhibitor families that bind the same site  
762 within the N-terminal domain of the viral CA protein. *J Virol*, 86, 6643-55.
- 763 LIU, Y., KATI, W., CHEN, C. M., TRIPATHI, R., MOLLA, A. & KOHLBRENNER, W.  
764 1999. Use of a fluorescence plate reader for measuring kinetic parameters with inner  
765 filter effect correction. *Anal Biochem*, 267, 331-5.
- 766 LOCKBAUM, G. J., LEIDNER, F., RUSERE, L. N., HENES, M., KOSOVRASTI, K.,  
767 NACHUM, G. S., NALIVAIIKA, E. A., ALI, A., YILMAZ, N. K. & SCHIFFER, C. A.  
768 2019. Structural Adaptation of Darunavir Analogues against Primary Mutations in HIV-  
769 1 Protease. *ACS Infect Dis*, 5, 316-325.
- 770 MAMMANO, F., PETIT, C. & CLAVEL, F. 1998. Resistance-associated loss of viral fitness in  
771 human immunodeficiency virus type 1: phenotypic analysis of protease and gag  
772 coevolution in protease inhibitor-treated patients. *J Virol*, 72, 7632-7.
- 773 MATAYOSHI, E. D., WANG, G. T., KRAFFT, G. A. & ERICKSON, J. 1990. Novel  
774 fluorogenic substrates for assaying retroviral proteases by resonance energy transfer.  
775 *Science*, 247, 954-8.
- 776 MITTAL, S., BANDARANAYAKE, R. M., KING, N. M., PRABU-JEYABALAN, M.,  
777 NALAM, M. N., NALIVAIIKA, E. A., YILMAZ, N. K. & SCHIFFER, C. A. 2013.  
778 Structural and thermodynamic basis of amprenavir/darunavir and atazanavir resistance  
779 in HIV-1 protease with mutations at residue 50. *J Virol*, 87, 4176-84.
- 780 MITTAL, S., CAI, Y., NALAM, M. N., BOLON, D. N. & SCHIFFER, C. A. 2012.  
781 Hydrophobic core flexibility modulates enzyme activity in HIV-1 protease. *J Am Chem*  
782 *Soc*, 134, 4163-8.
- 783 NALAM, M. N., ALI, A., REDDY, G. S., CAO, H., ANJUM, S. G., ALTMAN, M. D.,  
784 YILMAZ, N. K., TIDOR, B., RANA, T. M. & SCHIFFER, C. A. 2013. Substrate  
785 envelope-designed potent HIV-1 protease inhibitors to avoid drug resistance. *Chem Biol*,  
786 20, 1116-24.
- 787 NTEMGWA, M., BRENNER, B. G., OLIVEIRA, M., MOISI, D. & WAINBERG, M. A. 2007.  
788 Natural polymorphisms in the human immunodeficiency virus type 2 protease can  
789 accelerate time to development of resistance to protease inhibitors. *Antimicrob Agents*  
790 *Chemother*, 51, 604-10.



- 791 OZEN, A., HALILOGLU, T. & SCHIFFER, C. A. 2011. Dynamics of preferential substrate  
792 recognition in HIV-1 protease: redefining the substrate envelope. *J. Mol. Biol.*, 410,  
793 726–744.
- 794 OZEN, A., HALILOGLU, T. & SCHIFFER, C. A. 2012a. HIV-1 Protease and Substrate  
795 Coevolution Validates the Substrate Envelope As the Substrate Recognition Pattern. *J.*  
796 *Chem. Theory Comput.*, 8, 703–714.
- 797 OZEN, A., HALILOGLU, T. & SCHIFFER, C. A. 2012b. HIV-1 Protease and Substrate  
798 Coevolution Validates the Substrate Envelope As the Substrate Recognition Pattern. *J*  
799 *Chem Theory Comput*, 8.
- 800 OZEN, A., LIN, K. H., KURT YILMAZ, N. & SCHIFFER, C. A. 2014a. Structural basis and  
801 distal effects of Gag substrate coevolution in drug resistance to HIV-1 protease. *Proc.*  
802 *Natl. Acad. Sci. U. S. A.*, 111, 15993–15998.
- 803 OZEN, A., LIN, K. H., KURT YILMAZ, N. & SCHIFFER, C. A. 2014b. Structural basis and  
804 distal effects of Gag substrate coevolution in drug resistance to HIV-1 protease. *Proc*  
805 *Natl Acad Sci U S A*, 111, 15993-8.
- 806 PARRY, C. M., KOLLI, M., MYERS, R. E., CANE, P. A., SCHIFFER, C. & PILLAY, D.  
807 2011. Three residues in HIV-1 matrix contribute to protease inhibitor susceptibility and  
808 replication capacity. *Antimicrob. Agents Chemother.*, 55, 1106–1113.
- 809 PAULSEN, J. L., LEIDNER, F., RAGLAND, D. A., KURT YILMAZ, N. & SCHIFFER, C. A.  
810 2017. Interdependence of Inhibitor Recognition in HIV-1 Protease. *J Chem Theory*  
811 *Comput*, 13, 2300-2309.
- 812 PETTIT, S. C., HENDERSON, G. J., SCHIFFER, C. A. & SWANSTROM, R. 2002.  
813 Replacement of the P1 amino acid of human immunodeficiency virus type 1 Gag  
814 processing sites can inhibit or enhance the rate of cleavage by the viral protease. *J Virol*,  
815 76, 10226-33.
- 816 POTEMPA, M., LEE, S. K., KURT YILMAZ, N., NALIVAIIKA, E. A., ROGERS, A.,  
817 SPIELVOGEL, E., CARTER, C. W., JR., SCHIFFER, C. A. & SWANSTROM, R.  
818 2018. HIV-1 Protease Uses Bi-Specific S2/S2' Subsites to Optimize Cleavage of Two  
819 Classes of Target Sites. *J Mol Biol*, 430, 5182-5195.
- 820 PRABU-JEYABALAN, M., NALIVAIIKA, E. & SCHIFFER, C. A. 2002. Substrate shape  
821 determines specificity of recognition for HIV-1 protease: analysis of crystal structures of  
822 six substrate complexes. *Structure*, 10, 369-81.
- 823 PRABU-JEYABALAN, M., NALIVAIIKA, E. A., KING, N. M. & SCHIFFER, C. A. 2004.  
824 Structural basis for coevolution of a human immunodeficiency virus type 1  
825 nucleocapsid-p1 cleavage site with a V82A drug-resistant mutation in viral protease. *J.*  
826 *Virol.*, 78, 12446–12454.
- 827 PULIDO, F., ARRIBAS, J. R., HILL, A., VAN DELFT, Y. & MOECKLINGHOFF, C. 2011.  
828 Analysis of drug resistance during HIV RNA viraemia in the MONET trial of  
829 darunavir/ritonavir monotherapy. *Antivir Ther*, 16, 59-65.
- 830 RABI, S. A., LAIRD, G. M., DURAND, C. M., LASKEY, S., SHAN, L., BAILEY, J. R.,  
831 CHIOMA, S., MOORE, R. D. & SILICIANO, R. F. 2013. Multi-step inhibition explains  
832 HIV-1 protease inhibitor pharmacodynamics and resistance. *J Clin Invest*, 123, 3848-60.
- 833 RAGLAND, D. A., NALIVAIIKA, E. A., NALAM, M. N., PRACHANRONARONG, K. L.,  
834 CAO, H., BANDARANAYAKE, R. M., CAI, Y., KURT-YILMAZ, N. & SCHIFFER,  
835 C. A. 2014. Drug resistance conferred by mutations outside the active site through



- 836 alterations in the dynamic and structural ensemble of HIV-1 protease. *J Am Chem Soc*,  
837 136, 11956-63.
- 838 RAGLAND, D. A., WHITFIELD, T. W., LEE, S. K., SWANSTROM, R., ZELDOVICH, K. B.,  
839 KURT-YILMAZ, N. & SCHIFFER, C. A. 2017. Elucidating the Interdependence of  
840 Drug Resistance from Combinations of Mutations. *J Chem Theory Comput*, 13, 5671-  
841 5682.
- 842 RICHARDS, A. D., ROBERTS, R., DUNN, B. M., GRAVES, M. C. & KAY, J. 1989.  
843 Effective blocking of HIV-1 proteinase activity by characteristic inhibitors of aspartic  
844 proteinases. *FEBS Lett*, 247, 113-7.
- 845 RONG, L., RUSSELL, R. S., HU, J., GUAN, Y., KLEIMAN, L., LIANG, C. & WAINBERG,  
846 M. A. 2001. Hydrophobic amino acids in the human immunodeficiency virus type 1 p2  
847 and nucleocapsid proteins can contribute to the rescue of deleted viral RNA packaging  
848 signals. *J Virol*, 75, 7230-43.
- 849 ROSE, J. R., SALTO, R. & CRAIK, C. S. 1993. Regulation of autoproteolysis of the HIV-1 and  
850 HIV-2 proteases with engineered amino acid substitutions. *J Biol Chem*, 268, 11939-45.
- 851 SEELMEIER, S., SCHMIDT, H., TURK, V. & VON DER HELM, K. 1988. Human  
852 immunodeficiency virus has an aspartic-type protease that can be inhibited by pepstatin  
853 A. *Proc Natl Acad Sci U S A*, 85, 6612-6.
- 854 SHI, J., ZHOU, J., HALAMBAGE, U. D., SHAH, V. B., BURSE, M. J., WU, H., BLAIR, W.  
855 S., BUTLER, S. L. & AIKEN, C. 2015. Compensatory substitutions in the HIV-1 capsid  
856 reduce the fitness cost associated with resistance to a capsid-targeting small-molecule  
857 inhibitor. *J Virol*, 89, 208-19.
- 858 WATKINS, T., RESCH, W., IRLBECK, D. & SWANSTROM, R. 2003. Selection of high-level  
859 resistance to human immunodeficiency virus type 1 protease inhibitors. *Antimicrob  
860 Agents Chemother*, 47, 759-69.
- 861 WINDSOR, I. W. & RAINES, R. T. 2015. Fluorogenic Assay for Inhibitors of HIV-1 Protease  
862 with Sub-picomolar Affinity. *Sci Rep*, 5, 11286.
- 863 YILMAZ, A., IZADKHASHTI, A., PRICE, R. W., MALLON, P. W., DE MEULDER, M.,  
864 TIMMERMAN, P. & GISSLEN, M. 2009. Darunavir concentrations in cerebrospinal  
865 fluid and blood in HIV-1-infected individuals. *AIDS Res Hum Retroviruses*, 25, 457-61.
- 866 ZHANG, Y. M., IMAMICHI, H., IMAMICHI, T., LANE, H. C., FALLOON, J.,  
867 VASUDEVACHARI, M. B. & SALZMAN, N. P. 1997. Drug resistance during  
868 indinavir therapy is caused by mutations in the protease gene and in its Gag substrate  
869 cleavage sites. *J Virol*, 71, 6662-70.
- 870 ZHAO, G., PERILLA, J. R., YUFENYUY, E. L., MENG, X., CHEN, B., NING, J., AHN, J.,  
871 GRONENBORN, A. M., SCHULTEN, K., AIKEN, C. & ZHANG, P. 2013. Mature  
872 HIV-1 capsid structure by cryo-electron microscopy and all-atom molecular dynamics.  
873 *Nature*, 497, 643-6.
- 874 ZHOU, S., JONES, C., MIECZKOWSKI, P. & SWANSTROM, R. 2015. Primer ID Validates  
875 Template Sampling Depth and Greatly Reduces the Error Rate of Next-Generation  
876 Sequencing of HIV-1 Genomic RNA Populations. *J Virol*, 89, 8540-55.

878

879

880

881 **Figures**

1<sup>st</sup> Selection: Most Abundant Variants Detected at the Last Time Point

| Passage # | Drug Conc. (nM) | R1 | R2 | PIs     | Most Abundant Variants Detected at the Last Time Point | Abundance |
|-----------|-----------------|----|----|---------|--------------------------------------------------------|-----------|
| 53        | 4000            | 1  | 2  | UMASS-2 | 10I 28S 32I 33F 46I 71V 82I 84V                        | 31.0%     |
| 45        | 1275            | 1  | 4  | UMASS-4 | 10F 28S 46I 84V                                        | 9.4%      |
| 53        | 5000            | 2  | 1  | UMASS-6 | 13V 16E 32I 33F 45I 46I 54L 71V 76V 82F 84V            | 57.4%     |
| 58        | 400             | 2  | 2  | UMASS-7 | 10F 46I 50V 63P 85V                                    | 21.0%     |
| 61        | 1300            | 2  | 3  | UMASS-8 | 10F 46I 47V 50V 53L 63P 72V 73S 82I 85V                | 63.9%     |
| 39        | 3000            | -  | 1  | DRV     | 13V 16E 32I 33F 45I 46I 82F 84V                        | 45.3%     |
| 61        |                 |    |    | ND      | 93L                                                    | 36.7%     |

2<sup>nd</sup> Selection: Most Abundant Variants Detected at the Last Time Point

| Passage # | Drug Conc. (nM) | R1 | R2 | PIs      | Most Abundant Variants Detected at the Last Time Point  | Abundance |
|-----------|-----------------|----|----|----------|---------------------------------------------------------|-----------|
| 75        | 5000            | 1  | 1  | UMASS-1  | 10I 16E 32I 33F 46I 54L 71V 76V 82I 84V                 | 55.4%     |
| 82        | 5000            | 1  | 2  | UMASS-2  | 10F 33F 46I 47V 50V 71V 82I 84V                         | 37.5%     |
| 93        | 5000            | 1  | 3  | UMASS-3  | 10F 33F 46I 47V 50V 53L 63P 71V 76S 82I 85V 89I         | 85.7%     |
| 81        | 5000            | 1  | 4  | UMASS-4  | 10F 11I 13V 32I 33F 43T 46L 54L 71V 82I 84V 89M 91S 92R | 87.3%     |
| 77        | 5000            | 1  | 5  | UMASS-5  | 10F 15V 46I 47V 50V 53L 71V 82I 84V 89T                 | 67.9%     |
| 46        | 5000            | 2  | 1  | UMASS-6  | 10F 13V 33F 46I 47A 50V 53L 71V                         | 45.1%     |
| 76        | 5000            | 2  | 2  | UMASS-7  | 10F 13V 33F 46I 47V 50V 53L 54L 71V 82I                 | 94.5%     |
| 67        | 5000            | 2  | 3  | UMASS-8  | 10F 12K 33F 46I 47V 50V 53L 54L 63P 71V 82I 85V         | 55.4%     |
| 78        | 5000            | 2  | 4  | UMASS-9  | 10F 13V 33F 45R 46I 47V 50V 53L 54L 66F 71V 74A 76S 82I | 92.3%     |
| 77        | 5000            | 2  | 5  | UMASS-10 | 10F 13V 33F 43T 46I 47V 50V 54L 71V 82L 88S             | 91.2%     |
| 43        | 1350            | -  | 1  | DRV      | 32I 41I 47V 82I 84V 85V                                 | 62.8%     |
| 75        | 0               |    |    | ND       | WT                                                      | 82.9%     |

882

883 **Figure 1.** Point mutations of the most abundant variant observed at the highest drug  
 884 concentration from each selection pool. The green shaded box and the blue shaded box indicate  
 885 R1-1 and R1-2 side chains, respectively. The red lettering is for mutations and abundance in the  
 886 first selection started with the 26 mutants; the blue lettering is for the mutations and abundance  
 887 in the second selection started with just the wild type virus.

888

889

890

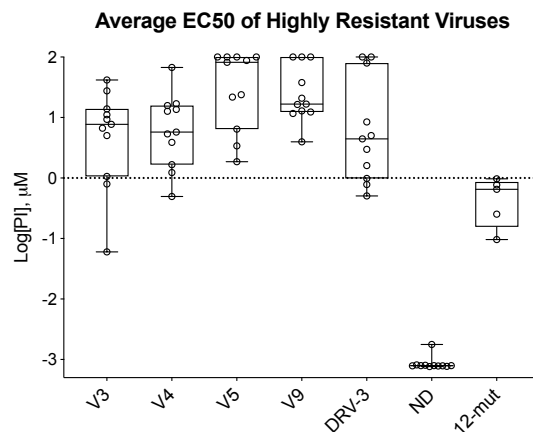

891

| Drug Conc. (nM) | R1 | R2 | PIs     | Most Abundant Variants Detected at the Last Time Point |     |     |     |     |     |     |     |     |     | Abundance |     |       |     |       |
|-----------------|----|----|---------|--------------------------------------------------------|-----|-----|-----|-----|-----|-----|-----|-----|-----|-----------|-----|-------|-----|-------|
| 5000            | 1  | 3  | UMASS-3 | 10F                                                    | 33F | 46I | 47V | 50V | 53L | 63P | 71V | 76S | 82I | 85V       | 89I | 85.7% |     |       |
| 5000            | 1  | 4  | UMASS-4 | 10F                                                    | 11I | 13V | 32I | 33F | 43T | 46L | 54L | 71V | 82I | 84V       | 89M | 91S   | 92R | 87.3% |
| 5000            | 1  | 5  | UMASS-5 | 10F                                                    | 15V | 46I | 47V | 50V | 53L | 71V | 82I | 84V | 89T |           |     | 67.9% |     |       |
| 5000            | 2  | 4  | UMASS-9 | 10F                                                    | 13V | 33F | 45R | 46I | 47V | 50V | 53L | 54L | 66F | 71V       | 74A | 76S   | 82I | 92.3% |

892

893 **Figure 2.** EC50 values of select highly resistant end-point variants vs all 11 inhibitors. V3, V4,  
 894 etc. refer to the virus pool for the specific UMASS inhibitor culture (e.g. UMASS-3 is V3, etc.).  
 895 Each virus pool, with the most abundant sequence in the pool shown, was tested against all 10  
 896 UMASS inhibitors with the EC50 values shown as points along with the mean, inner quartile in  
 897 the box, and the total range as whiskers. ND is the culture passaged with no drug selection. 12-  
 898 mut is a recombinant virus with just 12 mutations in the protease.

899

900

901

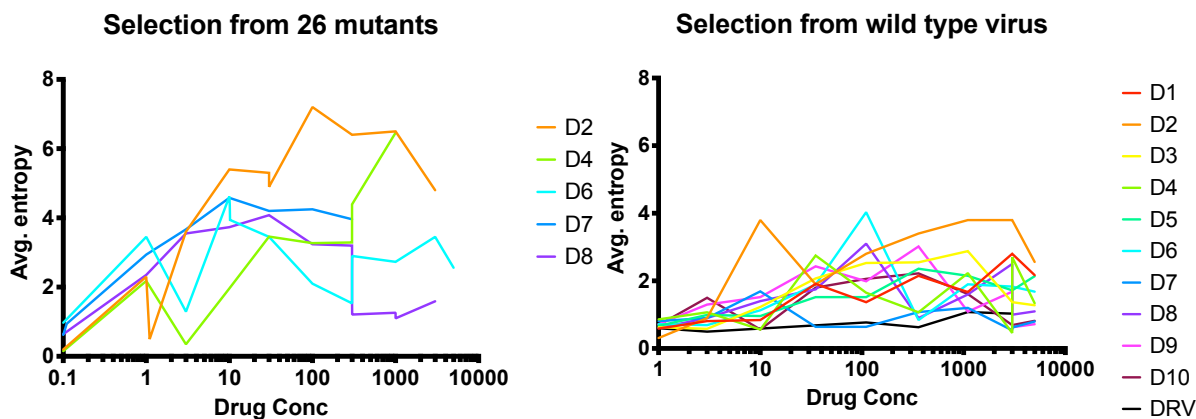

902

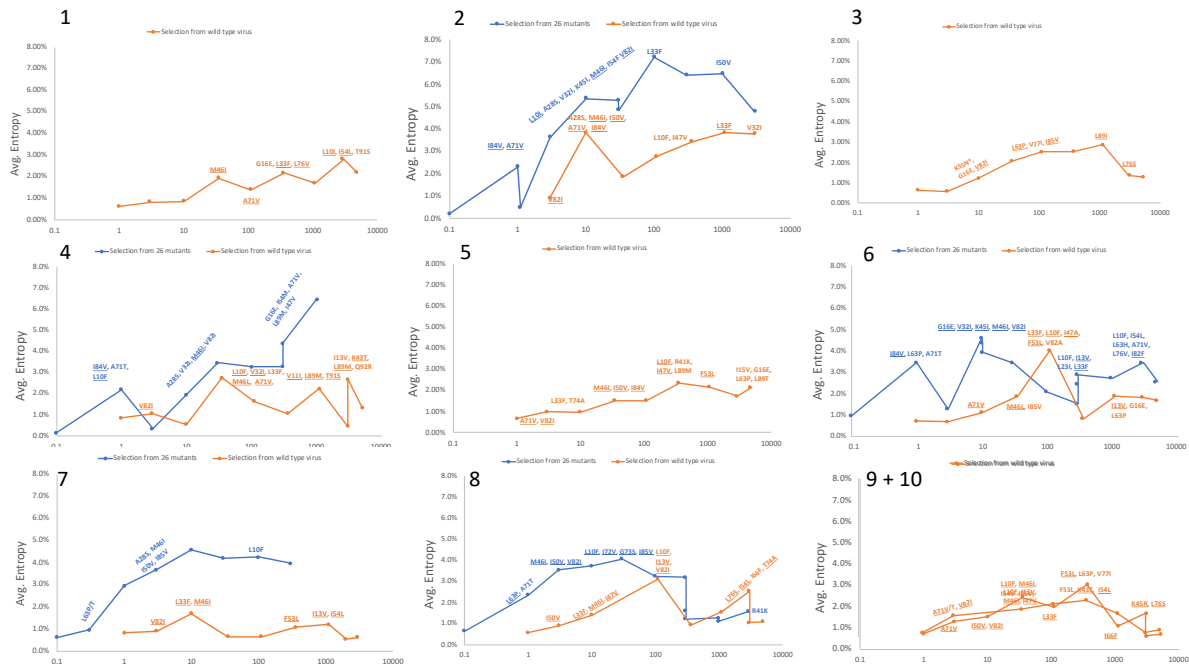

903

904 **Figure 3.** Shannon entropy of the viral pools for 15 selections of U1-10 – each trajectory was

905 passed between 40-80 times to attain high resistance.

906

907

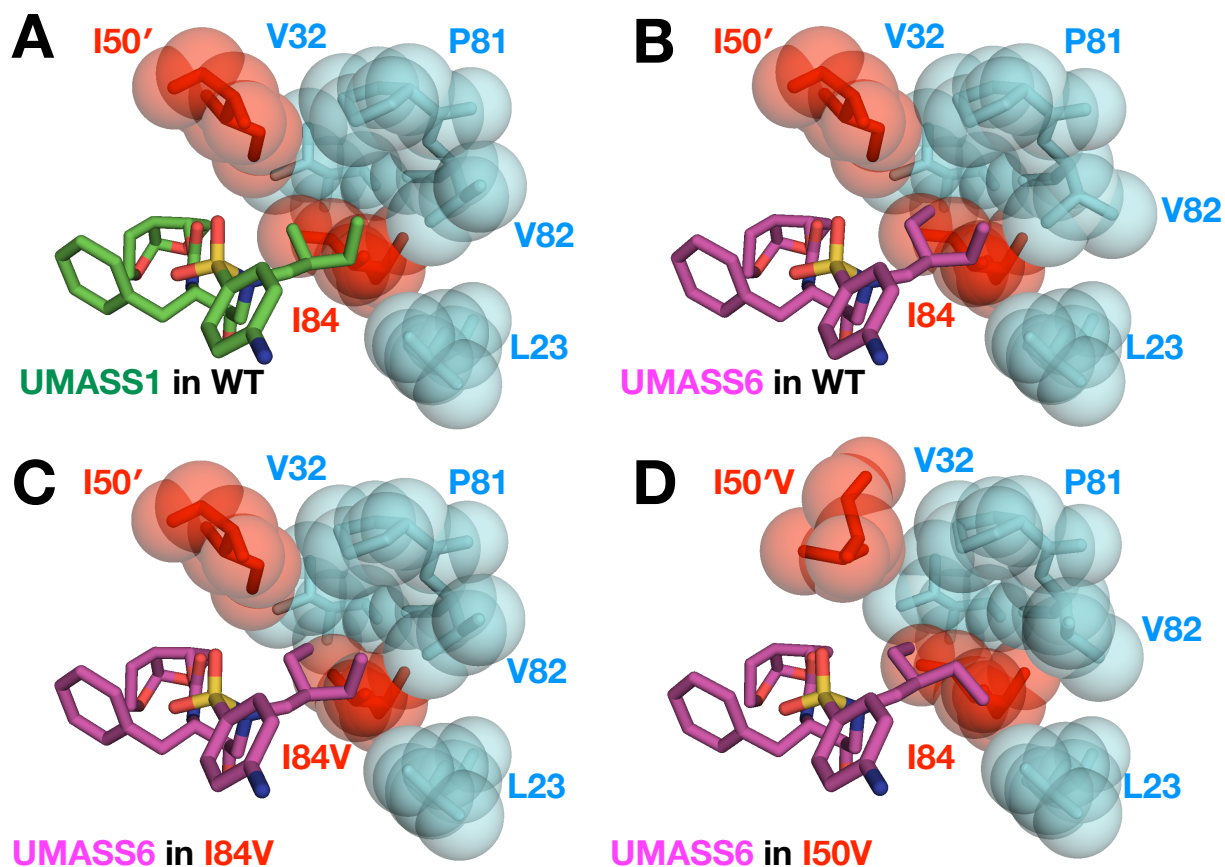

908

909 **Figure 4.** Hydrophobic packing in the S1' subsite. A) DRV in WT protease (PDB: 6DGX). B)

910 UMass6 in WT protease (PDB: 6DGZ). C) UMass6 in I84V variant (PDB: 6DH2). Inhibitor

911 and surrounding residues are identical to UM6-WT. D) UMass6 in I50V variant (PDB: 6DH8).

912 Inhibitor and I50V residue both adopt alternate conformations, ultimately reducing protease-

913 inhibitor vdW contacts.

914

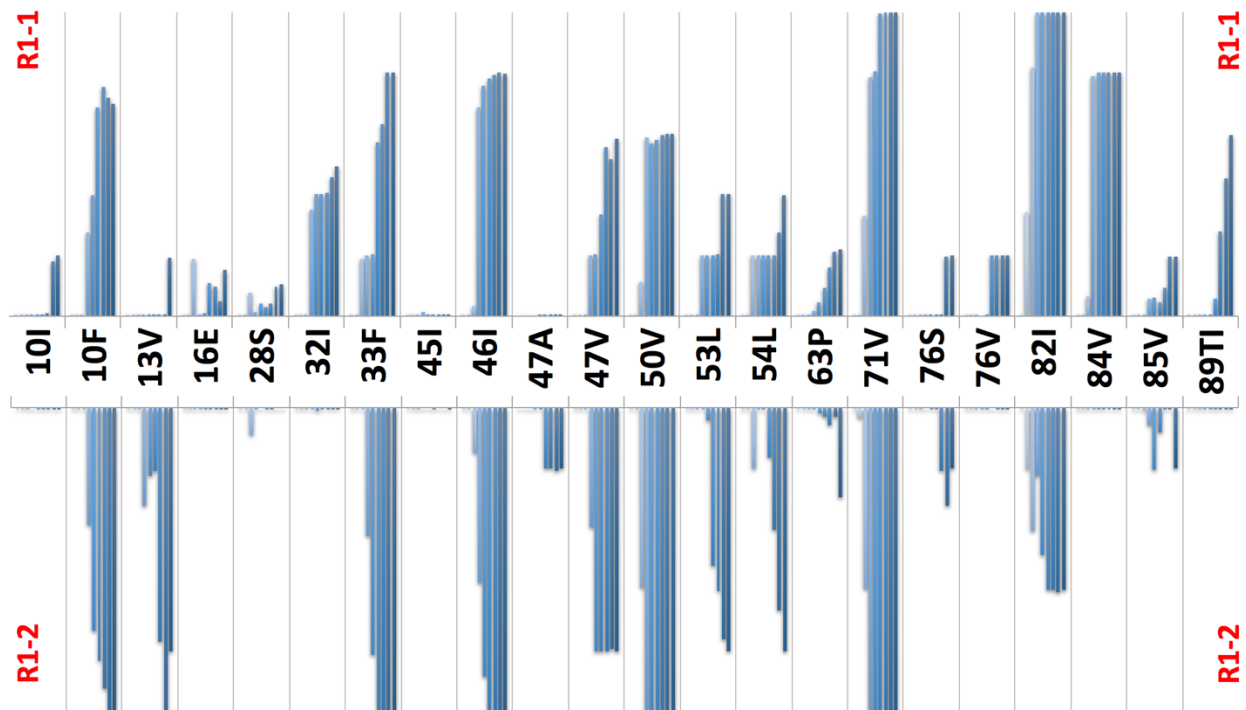

915

916 **Figure 5.** The abundance data from multiple selections pooled and examined sequentially at  
917 different levels of drug concentration/selective pressure. Mutations resulting from selections  
918 that were challenged with an inhibitor containing a R1 moiety (UMASS1-5) point upwards,  
919 while mutations derived from selections that were challenged with an inhibitor containing a R2  
920 moiety (UMASS6-10) point downwards.

921

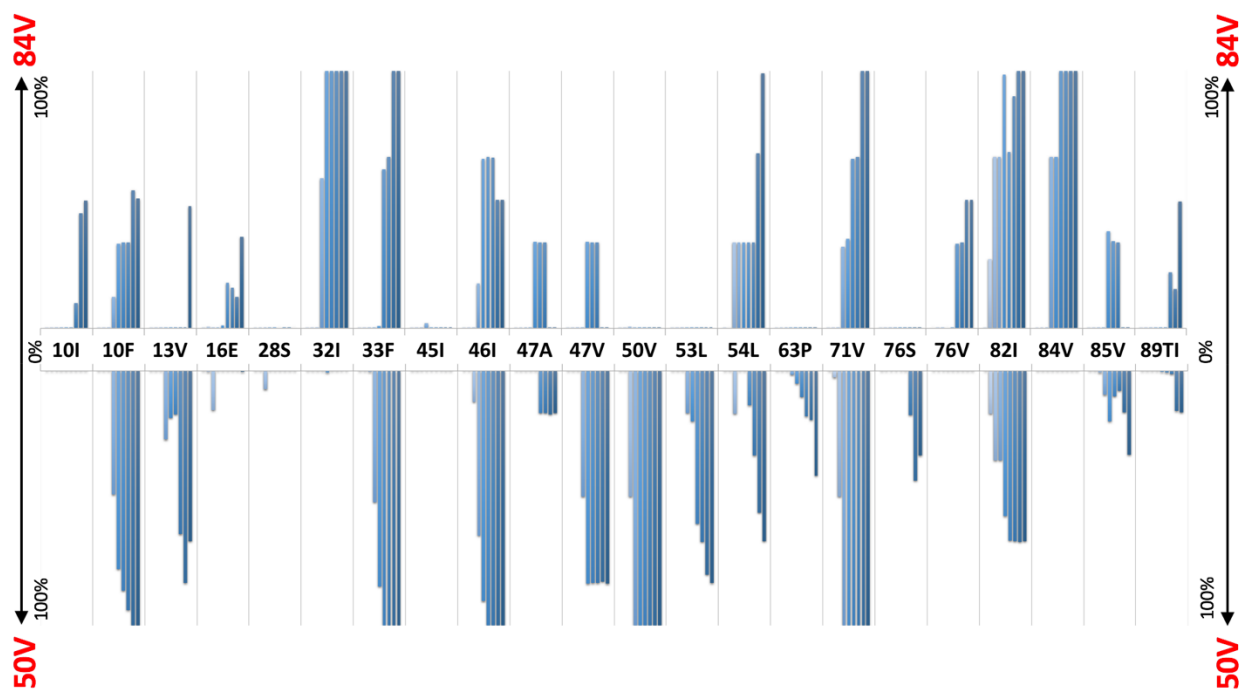

922

923 **Figure 6.** The abundance data from multiple selections that ended in one or the other pathway  
924 was pooled and examined sequentially at different levels of drug concentration/selective  
925 pressure. The selections resulting in the I84V pathway point up, with I84V reaching 100%  
926 penetrance by definition. Similarly, those selections that fixed I50V are shown pointing  
927 downward, with I50V reaching 100% penetrance.

928

929

930

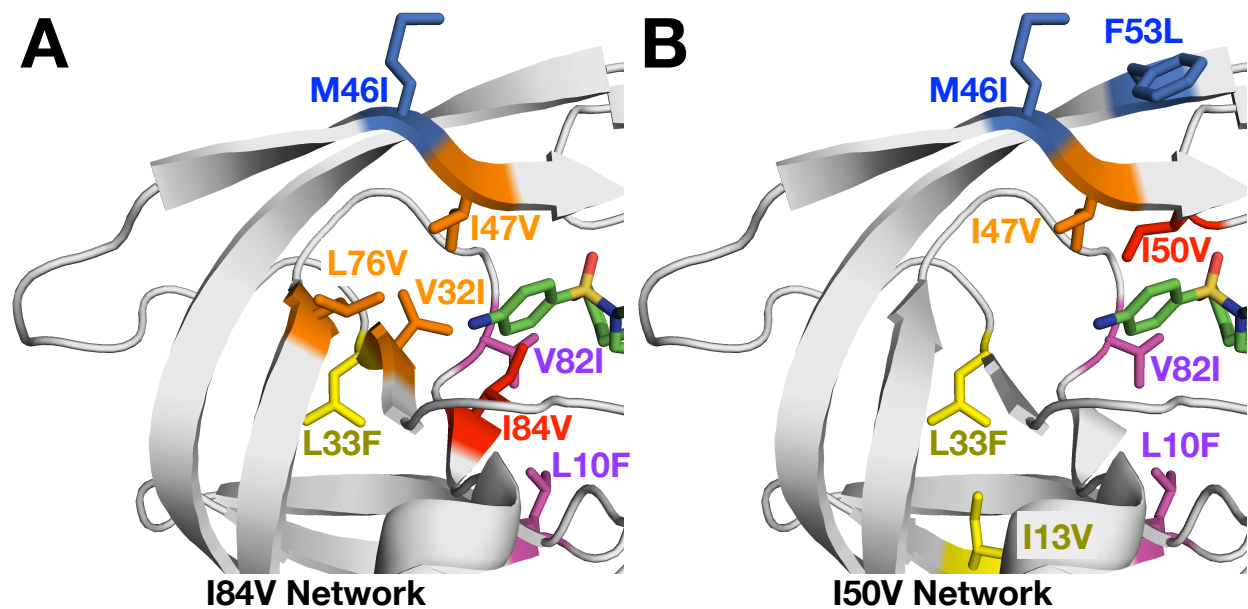

931

932 **Figure 7. A)** Mutations associated with I84V penetrance. **B)** Mutations associated with I50V

933 penetrance. Key mutation shown in red (I84V or I50V), outer flap residues in blue (M46I and

934 F53L), inner flap residues in orange (V32I, I47V, L76V), Hydrophobic Core in yellow (L33F

935 and I13V), V82I in purple, and Darunavir shown as green sticks.

936

937



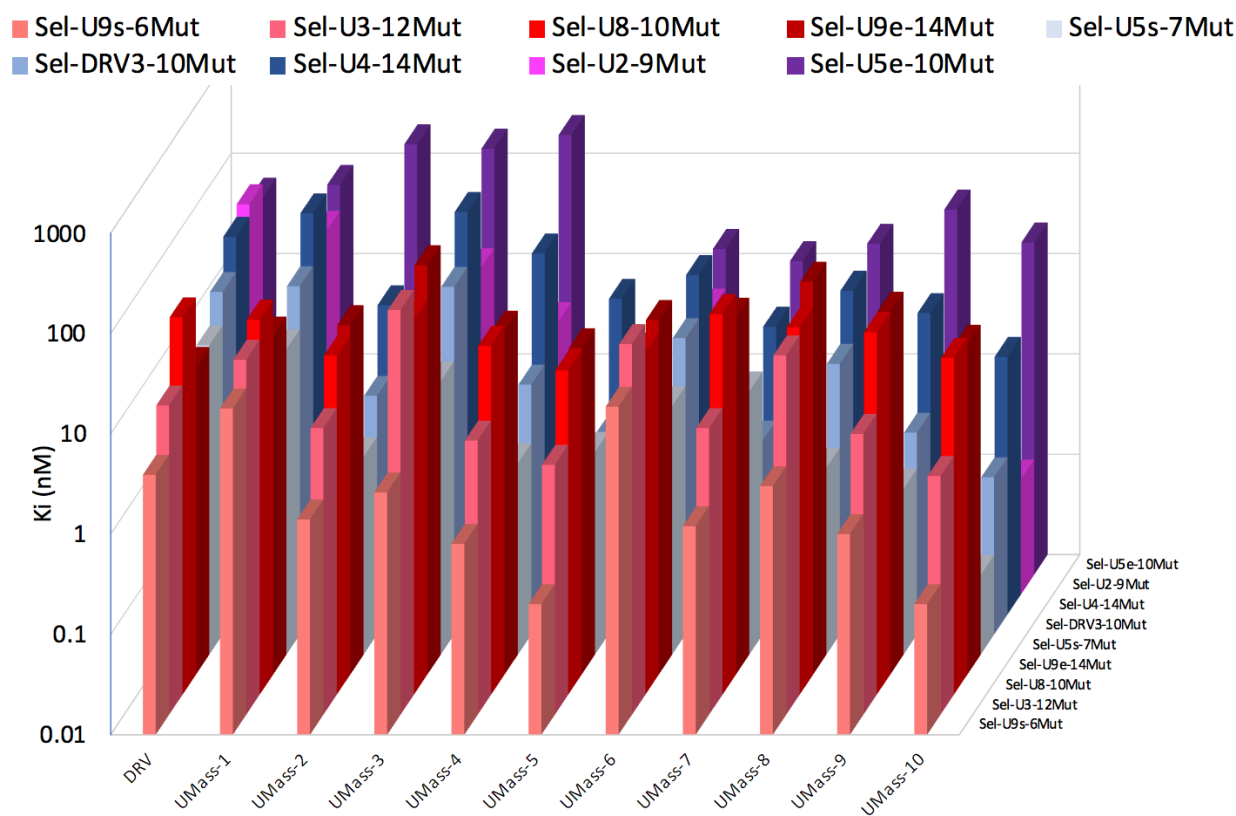

|               |      |         | NC | SP2 | P6  |     |
|---------------|------|---------|----|-----|-----|-----|
|               |      |         | P2 | -   | P1' | P5' |
| D1 <i>wt</i>  | 5000 | 84V     | V  |     |     | L   |
| D4 <i>mut</i> | 1275 | 84V     | V  |     | F   |     |
| D4 <i>wt</i>  | 5000 | 84V     | I  |     |     | I   |
| D6 <i>mut</i> | 5000 | 84V     | V  |     |     |     |
| D3 <i>wt</i>  | 5000 | 50V     |    |     | F   | L   |
| D6 <i>wt</i>  | 5000 | 50V     |    |     |     | L   |
| D7 <i>wt</i>  | 5000 | 50V     |    |     | F   |     |
| D8 <i>mut</i> | 1300 | 50V     |    |     |     | L   |
| D8 <i>wt</i>  | 5000 | 50V     |    |     | F   |     |
| D9 <i>wt</i>  | 5000 | 50V     |    |     | F   |     |
| D10 <i>wt</i> | 5000 | 50V     |    |     | F   |     |
| D2 <i>mut</i> | 4000 | 50V+84V |    |     |     | L   |
| D2 <i>wt</i>  | 5000 | 50V+84V |    |     | F   | L   |
| D5 <i>wt</i>  | 5000 | 50V+84V |    |     | F   | L   |

944

945 **Figure 9.** Mutations observed near protease cleavage sites for different inhibitors at the noted  
 946 inhibitor concentrations. Inhibitors are grouped by possession of one or both of the I50V and  
 947 I84V mutations.

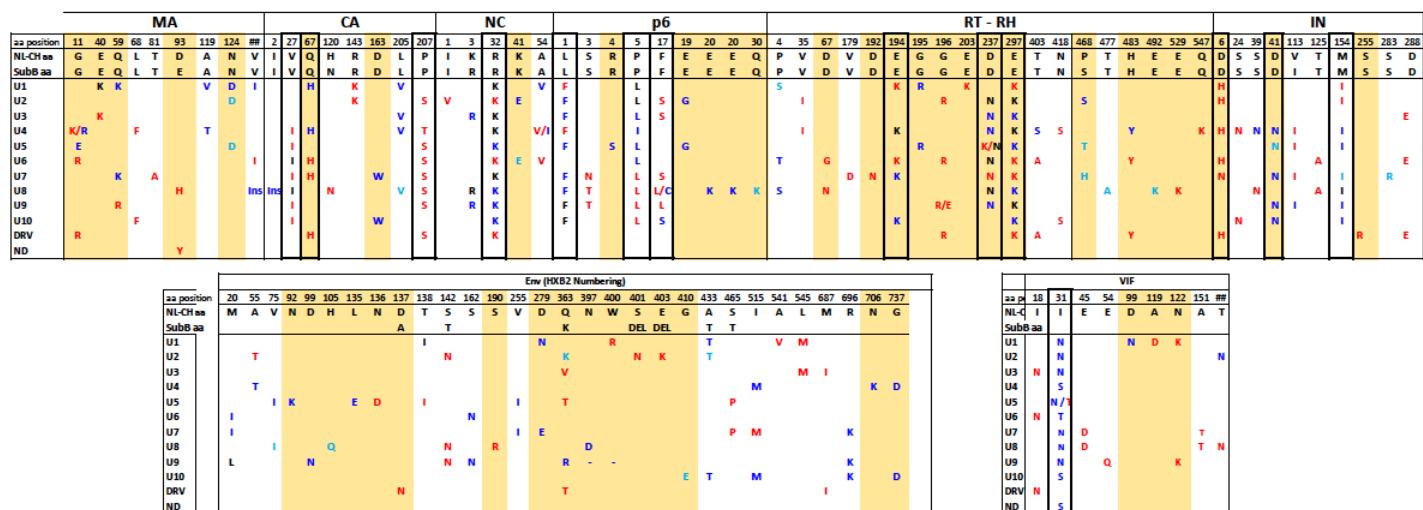

948  
 949 **Figure 10.** Observed sequence changes at endpoint bulk sequencing from 24 viral cultures.  
 950 Mutations that occur in 2 or more (unless there is a charge change) drug selections and are not  
 951 present in the no-drug control or consensus sequence are shown. 14 changes observed in 5 or  
 952 more sequence are boxed in bold. Yellow shading highlights a charge change. Red font in  
 953 mixed virus initiated selection, blue in NL4-3 initiated selection and black observed in both  
 954 selections.

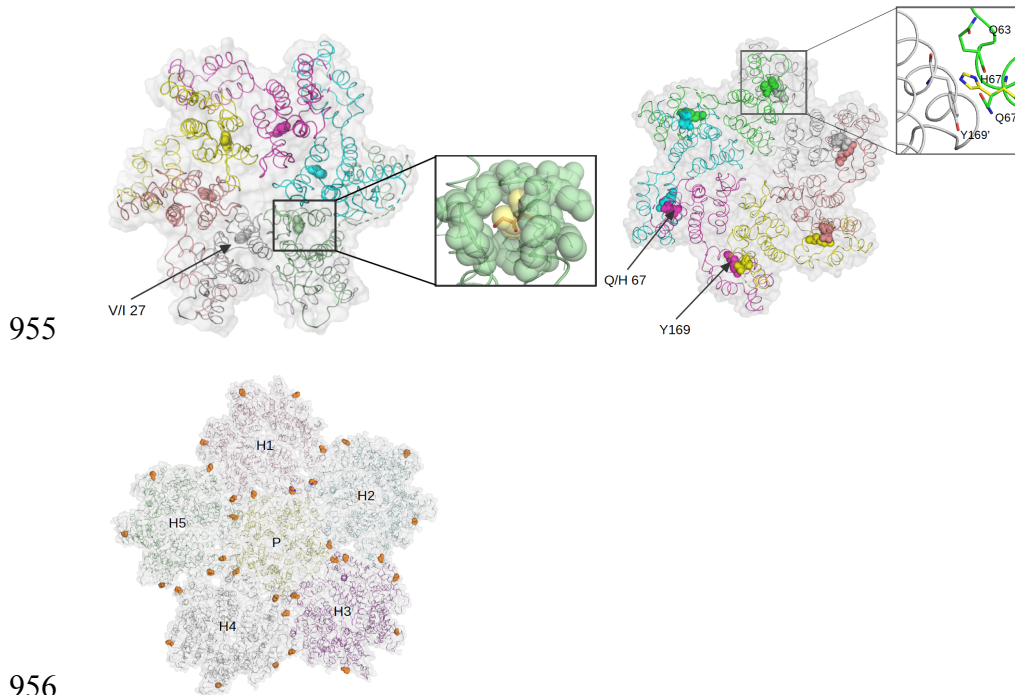

**Figure 11.** Observed changes in Capsid appear likely to stabilize the capsid structure.

Specifically V27I packs (Val in yellow vdW) more tightly filling a pocket (left), Q67H may form additional hydrogen bonding between monomers in the capsid hexamer (middle)(4YWM) and P207S occurs at the interface of hexamers in the viral pentamer (shown in orange spheres) (3J3Q) (right).

964

965

966 **Supplemental Figures**

967

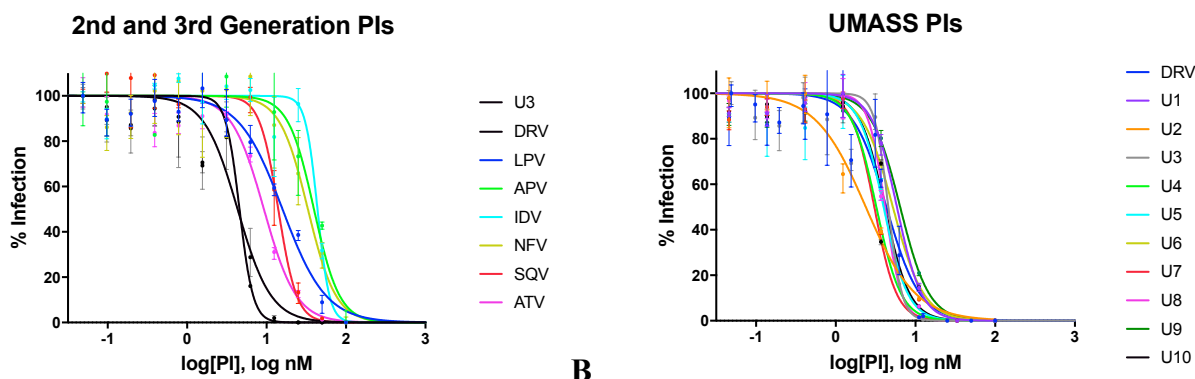

969 **Figure S1.** EC<sub>50</sub> inhibition curves for **A)** old and new protease inhibitors and **B)** analogs of  
 970 DRV.

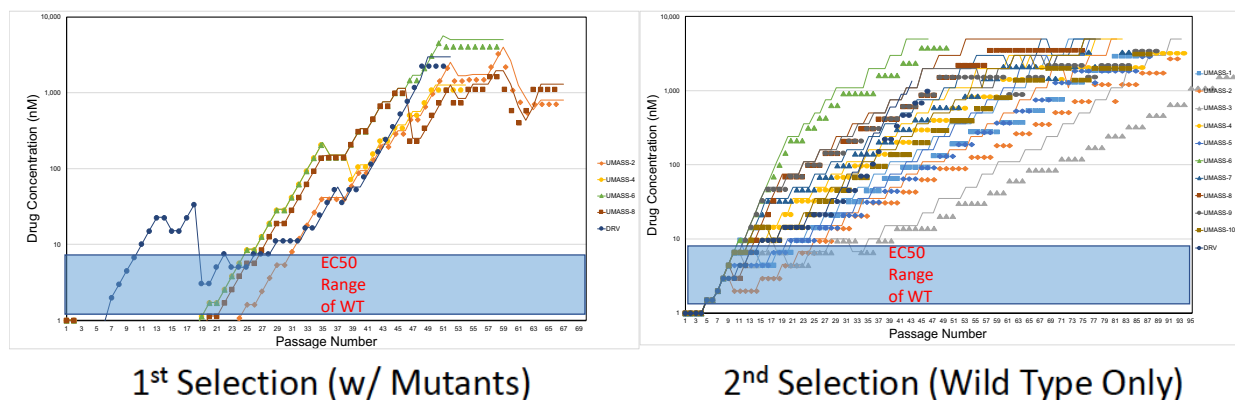

971

972

973 **Figure S2.** Viral selections with DRV and UMASS1-10 have increasing inhibitor  
 974 concentrations during passaging. Passages are increased when extensive CPE is observed  
 975 during PI selection. Virus generated from the 26 single mutants or NL4-3 molecular clone was  
 976 passaged in the presence of increasing inhibitor concentration as described in the text. The  
 977 period of time (in days) until the virus-infected culture displayed maximal CPE (massive  
 978 syncytia) was 4-7 days on average.

979

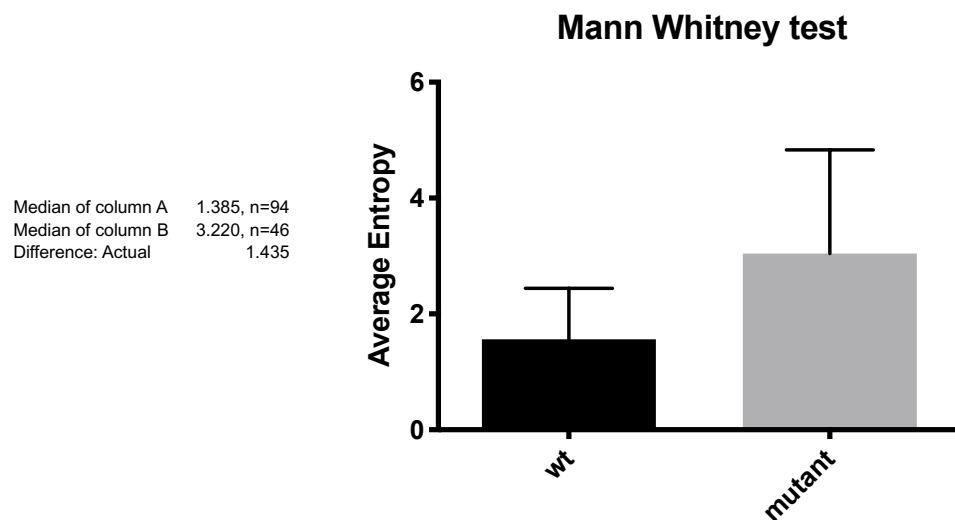

980

981 **Figure S3.** Mann-Whitney rank sum test for Shannon's entropy of the viral pools for 4 26-

982 mutant selections and 10 wild-type selections.

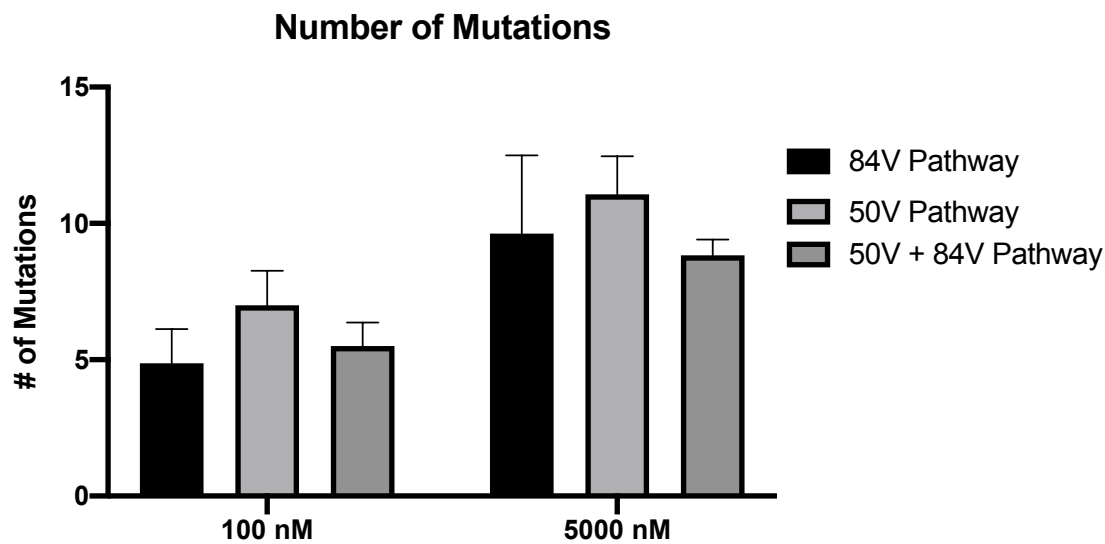

983

984

985 **Figure S4.** Average number of mutations for each resistance pathway. Mutation numbers at

986 drug concentrations of 100 nM and 5000 nM are shown.

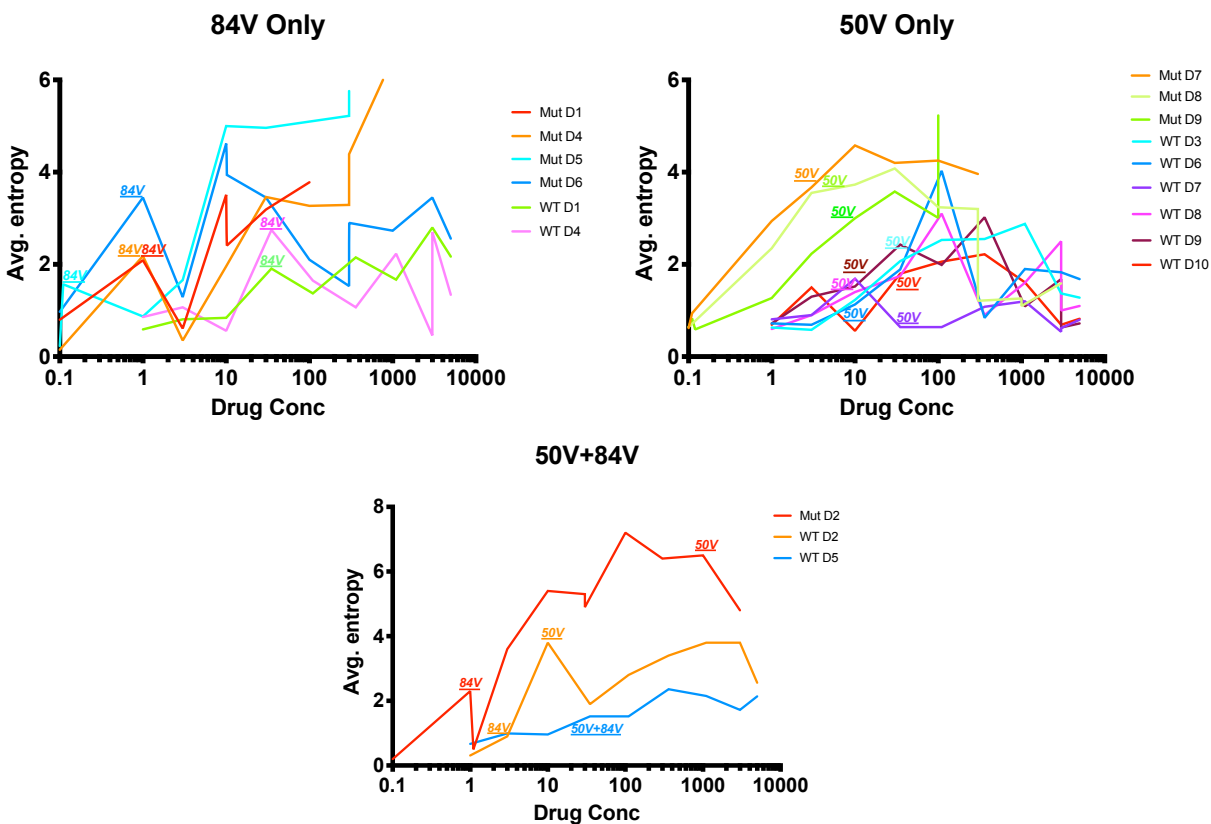

987  
 988 **Figure S5.** Shannon entropy of the viral pools for 20 selections of U1-10 – each trajectory was  
 989 passed between 40-80 times to attain high resistance

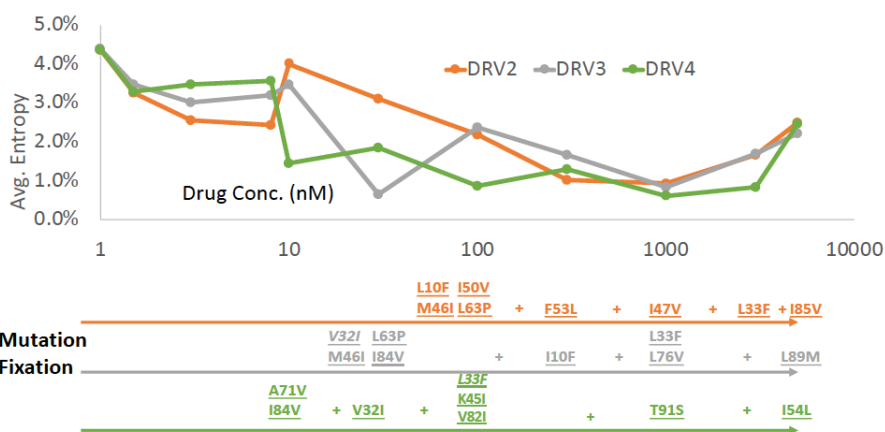

990  
 991 **Fig. S6** Changes of average entropy within the protease region through three DRV selections.  
 992 When mutations are fixed they are labeled in the bottom part of the figure. All the underlined  
 993 mutations were eventually fixed in the viral population.
